# Supplementary material for: Optimising HIV care using information obtained from PROMs: protocol for an observational study
Source: PubMed Central journal article supplement — BMJ Open. 2023 Nov 27;13(11):e073758. doi: 10.1136/bmjopen-2023-073758 (PMC10685965; doi:10.1136/bmjopen-2023-073758), 2023-11-27
Supplement: bmjopen-2023-073758.draft_revisions.pdf [file bmjopen-2023-073758.draft_revisions.pdf]

# BMJ Open

BMJ Open is committed to open peer review. As part of this commitment we make the peer review history of every article we publish publicly available.

When an article is published we post the peer reviewers' comments and the authors' responses online. We also post the versions of the paper that were used during peer review. These are the versions that the peer review comments apply to.

The versions of the paper that follow are the versions that were submitted during the peer review process. They are not the versions of record or the final published versions. They should not be cited or distributed as the published version of this manuscript.

BMJ Open is an open access journal and the full, final, typeset and author-corrected version of record of the manuscript is available on our site with no access controls, subscription charges or pay-per-view fees (<http://bmjopen.bmj.com>).

If you have any questions on BMJ Open's open peer review process please email [info.bmjopen@bmj.com](mailto:info.bmjopen@bmj.com)

# BMJ Open

## Optimising HIV care using information obtained from PROMs: Protocol for an observational study.

|                               |                                                                                                                                                                                                                                                                                                                                                                                                                                                                                                                                                                                                                                                                                                                                                                                                                                                                                                                                                                                                                                                                                                                                                                                                                                                                                                                                                                                                                                                                                                                                                                                                                                                                                                                                                                                                                                                                                                                                                                                                                                                                                                                                                                                                                                                                                                                                                                                                                                                                                                              |
|-------------------------------|--------------------------------------------------------------------------------------------------------------------------------------------------------------------------------------------------------------------------------------------------------------------------------------------------------------------------------------------------------------------------------------------------------------------------------------------------------------------------------------------------------------------------------------------------------------------------------------------------------------------------------------------------------------------------------------------------------------------------------------------------------------------------------------------------------------------------------------------------------------------------------------------------------------------------------------------------------------------------------------------------------------------------------------------------------------------------------------------------------------------------------------------------------------------------------------------------------------------------------------------------------------------------------------------------------------------------------------------------------------------------------------------------------------------------------------------------------------------------------------------------------------------------------------------------------------------------------------------------------------------------------------------------------------------------------------------------------------------------------------------------------------------------------------------------------------------------------------------------------------------------------------------------------------------------------------------------------------------------------------------------------------------------------------------------------------------------------------------------------------------------------------------------------------------------------------------------------------------------------------------------------------------------------------------------------------------------------------------------------------------------------------------------------------------------------------------------------------------------------------------------------------|
| Journal:                      | <i>BMJ Open</i>                                                                                                                                                                                                                                                                                                                                                                                                                                                                                                                                                                                                                                                                                                                                                                                                                                                                                                                                                                                                                                                                                                                                                                                                                                                                                                                                                                                                                                                                                                                                                                                                                                                                                                                                                                                                                                                                                                                                                                                                                                                                                                                                                                                                                                                                                                                                                                                                                                                                                              |
| Manuscript ID                 | bmjopen-2023-073758                                                                                                                                                                                                                                                                                                                                                                                                                                                                                                                                                                                                                                                                                                                                                                                                                                                                                                                                                                                                                                                                                                                                                                                                                                                                                                                                                                                                                                                                                                                                                                                                                                                                                                                                                                                                                                                                                                                                                                                                                                                                                                                                                                                                                                                                                                                                                                                                                                                                                          |
| Article Type:                 | Protocol                                                                                                                                                                                                                                                                                                                                                                                                                                                                                                                                                                                                                                                                                                                                                                                                                                                                                                                                                                                                                                                                                                                                                                                                                                                                                                                                                                                                                                                                                                                                                                                                                                                                                                                                                                                                                                                                                                                                                                                                                                                                                                                                                                                                                                                                                                                                                                                                                                                                                                     |
| Date Submitted by the Author: | 16-Mar-2023                                                                                                                                                                                                                                                                                                                                                                                                                                                                                                                                                                                                                                                                                                                                                                                                                                                                                                                                                                                                                                                                                                                                                                                                                                                                                                                                                                                                                                                                                                                                                                                                                                                                                                                                                                                                                                                                                                                                                                                                                                                                                                                                                                                                                                                                                                                                                                                                                                                                                                  |
| Complete List of Authors:     | <p>Moody, Kevin; Amsterdam UMC, University of Amsterdam, Department of Internal Medicine, Division of Infectious Diseases, Amsterdam Institute for Infection and Immunology; Amsterdam Public Health Research Institute</p> <p>Nieuwkerk, P.T.; Amsterdam UMC, University of Amsterdam, Department of Internal Medicine, Division of Infectious Diseases, Amsterdam Institute for Infection and Immunology; Amsterdam Public Health Research Institute</p> <p>Bedert, Maarten; Amsterdam UMC, University of Amsterdam, Department of Internal Medicine, Division of Infectious Diseases, Amsterdam Institute for Infection and Immunology</p> <p>Nellen, Jeannine; Amsterdam UMC, University of Amsterdam, Department of Internal Medicine, Division of Infectious Diseases, Amsterdam Institute for Infection and Immunology; DC Klinieken, Department of Internal Medicine and Infectious Diseases</p> <p>Weijnsfeld, Annouschka; Amsterdam UMC, University of Amsterdam, Department of Internal Medicine, Division of Infectious Diseases</p> <p>Sigaloff, Kim; Amsterdam UMC, Vrije Universiteit, Department of Internal Medicine, Division of Infectious Diseases, Amsterdam Institute for Infection and Immunology</p> <p>Laan, Laura; Amsterdam UMC, Vrije Universiteit, Department of Internal Medicine, Division of Infectious Diseases</p> <p>Bruins, Claire; Amsterdam UMC, University of Amsterdam, Department of Internal Medicine, Division of Infectious Diseases</p> <p>Elsenburg, Loek; DC Klinieken, Department of Internal Medicine and Infectious Diseases</p> <p>van Oers, Hedy; Amsterdam UMC, University of Amsterdam, Child and Adolescent Psychiatry &amp; Psychological Care, Emma Children's Hospital, Amsterdam Reproduction and Development; Amsterdam Public Health Research Institute</p> <p>Haverman, Lotte; Amsterdam UMC, University of Amsterdam, Child and Adolescent Psychiatry &amp; Psychological Care, Emma Children's Hospital, Amsterdam Reproduction and Development; Amsterdam Public Health Research Institute</p> <p>Geerlings, Suzanne; Amsterdam UMC, University of Amsterdam, Department of Internal Medicine, Division of Infectious Diseases, Amsterdam Institute for Infection and Immunology; Amsterdam Public Health Research Institute</p> <p>Van der Valk, Marc; Amsterdam UMC, University of Amsterdam, Department of Internal Medicine, Division of Infectious Diseases, Amsterdam Infection &amp; Immunity Institute, Amsterdam Public Health</p> |

1  
2  
3  
4  
5  
6  
7  
8  
9  
10  
11  
12  
13  
14  
15  
16  
17  
18  
19  
20  
21  
22  
23  
24  
25  
26  
27  
28  
29  
30  
31  
32  
33  
34  
35  
36  
37  
38  
39  
40  
41  
42  
43  
44  
45  
46  
47  
48  
49  
50  
51  
52  
53  
54  
55  
56  
57  
58  
59  
60

|           |                                                                                                                                                                                   |
|-----------|-----------------------------------------------------------------------------------------------------------------------------------------------------------------------------------|
|           | Research Institute; HIV Monitoring Foundation                                                                                                                                     |
| Keywords: | Quality of Life, Patient Reported Outcome Measures, HIV & AIDS < INFECTIOUS DISEASES, Quality in health care < HEALTH SERVICES ADMINISTRATION & MANAGEMENT, Patient-Centered Care |
|           |                                                                                                                                                                                   |

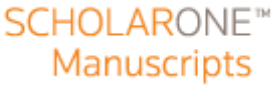

## Optimising HIV care using information obtained from PROMs: Protocol for an observational study.

### ABSTRACT (word count 276)

**Introduction** Successful antiviral therapy has transformed human immunodeficiency virus (HIV) infection into a chronic condition. Optimizing quality of life (QoL) remains an allusive but essential component of successful lifelong treatment. Patient-reported outcome measures (PROMs) are effective in early signalling of potential physical and mental health problems. This study aims to determine whether the PROMs in routine clinical care improve people with HIV's (PWH) experienced quality of care.

**Methods and analysis** We report the protocol of a multicentre longitudinal cohort studying PWH at three HIV treatment centres in the Netherlands affiliated with Amsterdam University Medical Centers. Once yearly, PROMs are offered to patients via the patient portal of the electronic health record in two clinics and via an external portal in the third. Our intervention comprises: (1) patients' completion of PROMs, (2) discussion of PROMs scores during annual consultations, and (3) documentation of follow-up actions in an individualised care plan, if indicated. The primary endpoint will be patient-experienced quality of care as measured by the Patient Assessment of Chronic Illness Care, Short Form (PACIC-S). Patients will provide measurements at baseline, Year 1, and Year 2. We will explore change over time in PACIC-S and PROMs scores and examine the socio-demographic and HIV-specific characteristics of subgroups of patients who participated in all or only part of the intervention to ascertain whether benefit has been achieved from our intervention in all subgroups.

**Ethics and dissemination** Consent is obtained by Stichting HIV Monitoring (SHM) that gathers and analyses pseudonymised data for PWH in The Netherlands as part of the ATHENA cohort. We will report the analysis of the baseline data, as well as results after Year 1 and Year 2.

### Keywords

Quality of Life, HIV & AIDS (Infectious diseases), Patient Reported Outcome Measures, Patient centred care

### Article Summary

- This study is among the first to determine in HIV routine clinical care whether discussion of quality-of-life domains as measured by PROMs scores during annual consultations with follow-up actions, if indicated, improves patient experience of quality of care.
- The multi-site, longitudinal design with links to socio-demographic and HIV-specific data will provide an opportunity to make detailed inferences about obtained benefits based on patient characteristics.
- This study will analyse changes in quality-of-life domains and patient experience of quality of care over time among patient sub-groups who were exposed to the entire intervention or only parts thereof to determine if differences outcomes arise among these groups.

- Patients with limited literacy, limited digital literacy and limited access to digital health solutions are potentially the people who might benefit most from PROMs, but they cannot participate in this study.

**ARTICLE** (word count 2069)

## **INTRODUCTION**

In the last 40 years the life expectancy of people living with HIV (PWH) has increased immensely due to the availability of safe and effective antiretroviral treatment transforming the condition into a chronic condition. PWH who enter care without severe HIV-associated complications have a similar life expectancy to those without HIV but lack behind in quality of life. [1] PWH are at greater risk of experiencing multiple chronic comorbidities as they age [2], including cardiovascular diseases, cancers, and psychological conditions, such as depression [3]. They might also experience stigma and discrimination due to multiple stigmatised identities, including their HIV disease and characteristics that make them vulnerable to HIV, such as their sexuality or migration status. [4] Together, increased risk of multiple chronic comorbidities and stigma and discrimination can combine to negatively affect the quality of life (QoL) of PWH. [5-7]

Patient-reported outcome measures (PROMs) are validated instruments that measure QoL among specific domains, including physical and mental health functioning, stigma, medication adherence, social status, housing, finances, and sexuality. [8,9] Discussion of PROMs scores between patients and healthcare providers (HCP) as part of routine clinical care for diseases, such as diabetes, arthritis, asthma, cancer, and HIV facilitate shared decision making [9,10]; improve communications between patients and HCP [9-15]; help to signal potential health problems [15,16], including psychosocial issues [11,17,18]; and increase patient satisfaction with care [19].

### **Study aims and hypothesis**

The primary objective of our study is to determine whether the quality of routine clinical HIV care as perceived by PWH improves with the introduction of PROMs, which involves patients completing PROMs questionnaires, HCP discussing PROMs scores during annual consultations, and documenting follow up actions in individual care plans, if indicated.

We hypothesise that the experience of quality of care among PWH will improve by introducing PROMs to routine HIV care through the early signalling of physical and psychosocial health problems, followed up with subsequent actions, if indicated.

## **METHODS AND ANALYSIS**

### **Setting**

This is a multicentre longitudinal cohort studying PWH who are treated at one of three HIV treatment centres in the Netherlands affiliated with Amsterdam University Medical Centers (AMC site, VUMC site, and DC Klinieken) together taking care of 3884 individuals. Appendix 1 in the supplement provides patient and HCP details per site.

### **Study procedures**

PROMs will be sent to people in care once yearly as an integral component of routine care one to two weeks prior to their consultation and can be completed in their electronic patient portal at AMC and VUMC and on an external portal at DC Klinieken. PROMs scores will be

discussed with HCP during the annual control consultation. Physicians and nurses in participating centres work together in fixed pairs, which we consider clusters for this study.

### Eligibility

Patients able to engage with healthcare providers in either English and Dutch and who are registered with the electronic patient portal at Amsterdam UMC will be offered the PROMs to complete before their annual consultations. All patients at DC Klinieken will be sent an invitation to register with the external PROMs portal.

### Recruitment

We will approach consecutive patients in two groups. Group 1 will comprise individuals whose annual control consultations take place in the first six months after the rollout of PROMs in the clinics. Rollout will take place sequentially per site. Group 2 will comprise individuals who were approached but who did not complete PROMs in Year 1. Group 2 will be offered PROMs once again in Year 2 and followed as a separate group.

### PROMs selected for routine clinical care

We consulted internal and external stakeholders in late 2020 to determine which domains were most relevant to address the QoL of PWH. Internally, the core team comprising key HIV nurses, infectious disease physicians, a psychiatrist, a social worker, and a medical psychologist first assessed the needs of their patient populations and translated these into QoL domains for which PROMs could be implemented. Externally, these were reviewed and adapted by representatives from community organisations, including the national association of PWH (*Hiv vereniging*), an organisation that works with people who use drugs (Mainline), and by a lawyer specialised in migration law. Members of the PROMs Expertise Centre of Amsterdam UMC provided technical support on the PROMs that would address those domains and will provide training to HCP.

Appendix 2 in the supplement provides the full list of PROMs selected, their characteristics, and their sources. Where possible, we selected Patient-Reported Outcomes Measurement Information System (PROMIS) Computer Adaptive Tests (CATs) for which the selection of items is tailored to the individual based on responses to prior items. [20] This minimizes the burden on the patient while providing maximally useful information and accuracy. [21] Appendix 3 provides technical details of which PROMIS instruments were used and Appendices 4 to 8 provide details about the questionnaires that we created or adapted.

### Individualised care plan

Individual care plans will be completed by the HCP after the PROMs scores have been discussed at the outpatient clinic. The individual care plans will indicate whether the PROMs have been discussed and describe types of information provided and/or referrals made to other departments within the hospital, medical or allied medical services outside the hospital, or community/peer support. Follow up will take place at the next six-monthly consultation unless otherwise agreed upon in the consultation.

Documentation of the individualised care plan will take place via an electronic form integrated in the electronic health record at AMC and VUMC or the external portal at DC Klinieken that leads the HCP through a set of questions related to their clinical findings. Figure 1 shows the logic flow that the template takes to guide the HCP in documenting the individualised care plan. The HCP can document actions for up to three different PROMs,

1  
2  
3 labelled in Figure 1 as PROM A, PROM B, and PROM C, that represent quality of life  
4 categories triggered by PROMs scores.  
5  
6  
7

8 Figure 1: Individualised care plan flowchart  
9

### 10 **Endpoints**

11 The primary endpoint will be patient-experienced quality of care as measured by the Patient  
12 Assessment of Chronic Illness Care, Short Form (PACIC-S), which measures patients'  
13 experiences with how closely services follow the Chronic Care Model. [22,23] PACIC-S  
14 scores indicating a higher experienced quality of care have been shown to be correlated with  
15 PROMs scores indicating a better quality of life. [23-25] This questionnaire is delivered to  
16 patients as part of the basic package of PROMs (see Appendix 2 in the supplement). All other  
17 PROMs are secondary outcome measures.  
18  
19

### 20 **Sample size**

21 To be able to detect a change in our primary outcome, the PACIC-S total score, with an effect  
22 size of 0.2 (Cohen's d, small sized effect) [26] from baseline to the follow-up measurements  
23 with 80% power and a two-sided p-value of 0.05, a total of 199 patients would be required.  
24  
25

26 To account for the clustered nature of the data (patients are nested within fixed pairs of  
27 HCPs), we will multiply this sample size by a correction factor of  $1 + (m - 1) \rho$ , where  $m$  is  
28 the mean expected cluster size and  $\rho$  is the anticipated intracluster correlation coefficient.  
29 [27] We assume an intracluster correlation of  $\rho=0.017$  [27]. Assuming we will recruit  $m$  of 13  
30 patients per cluster, the correction factor is 1.204 for the cluster design. To account for the  
31 clustered design, the study would require a total of 240 patients, which we will obtain by  
32 approaching consecutive patients until we reach or surpass this number.  
33  
34

### 35 **Data collection and assessment**

36  
37  
38  
39 Figure 2: Study timeline and data collection points  
40

41 Figure 2 provides the schema for data collection. Group 1 will provide three measurement  
42 moments: G1 baseline, G1 Year 1, and G1 Year 2. Group 2 will provide two measurement  
43 moments: G2 baseline and G2 Year 1.  
44

### 45 **Analysis and statistical considerations**

#### 46 **Descriptive statistics**

47  
48  
49  
50 Descriptive data will include PROMs scores, demographics – age, sex, gender, location of  
51 treatment centre, country/region of origin – and HIV-specific characteristics – year of  
52 diagnosis, viral load suppressed or not, CD4 count.  
53  
54

#### 55 **Statistical analysis**

56  
57 We will compare demographic and HIV-specific characteristics among patients who  
58 complete the PROMs, those who received the PROMs and do not complete them, and those  
59 who were not offered PROMs because they do not have access to the electronic patient  
60

portals. We will determine whether our sample is representative of the total patient population using chi-squared tests and Student t-tests, analysis of variance (ANOVA) or their non-parametric counterparts were appropriate.

We will analyse changes in the PACIC-S and PROMs scores over time using mixed linear models. The PACIC-S and the PROMs are the dependent variables. Time will be included as a categorical fixed factor (baseline, Year 1, Year 2). Repeated measurements will be nested within participants to account for the clustering of data within participants. We will include a random intercept on the HCP pairs level to account for the clustering of data within HCP pairs.

We will investigate change over time in PACIC-S and PROMS scores among all patients who were offered the intervention (intention-to-treat population). Additionally, we will explore change over time in PACIC-S and PROMS scores among subgroups of patients 1) with whom PROMS scores were discussed without further follow-up actions, 2) with whom PROMS scores were discussed with subsequent documentation of follow-up activities within individualised care plans, and 3) those who completed the PROMs but where the scores were not discussed with the HCP.

To identify socio-demographic/ HIV-specific characteristics significantly associated with obtaining more or less benefit from PROMs we will conduct series of mixed linear models in which socio-demographic/ HIV-specific characteristics will be added one by one as fixed factors to the model that also includes time as fixed factor. The PACIC-S and other PROMS scores will be the dependent variable. Socio-demographic/ HIV-specific characteristics with a Wald  $\chi^2$  test p-value  $<0.20$  will be included in further multivariate modelling. Subsequently, socio-demographic/ HIV-specific characteristics with p-values  $>0.05$  will be removed from the multivariate model using backward elimination.

Two-sided p-values  $<0.05$  are considered to indicate statistical significance. Data analysis will be conducted using SPSS version 26 and/or Stata version 16.

## DISCUSSION

This study aims to show whether discussing PROMs and any subsequent follow-up actions will lead to an improvement in quality of care, as experienced by PWH in our HIV outpatient clinics.

For routine clinical care in HIV outpatient clinics, earlier studies have shown that PROMs can help identify previously unnoticed physical and mental health problems [16,28] identify problematic substance use [29], and improve adherence [15,28]. In our study, we introduce the PWH perspective by exploring whether engagement in PROMs affects patient-experienced quality of care, which can be linked to patient-centredness, and system-related Chronic Care Model domains as measured by the PACIC-S [22,23].

### Strengths and Limitations

The study's strengths lay in its multi-site, longitudinal design, along with links to socio-demographic and HIV-specific data, which will allow us to make inferences about obtained benefit based on patient characteristics and determine how representative our sample is. One limitation is that this is an observational study. We could have created a control arm where PROMs scores would be completed but not discussed; however, it is well known that patient



1  
2  
3 motivation to complete future PROMs diminishes when scores are not discussed. [30]  
4 Furthermore language and literacy are sources of selection bias; up to 40% of our population  
5 cannot engage in Dutch, the only language supported by the patient portal at two sites. A  
6 parallel programme of work seeks to support people with digital, language or literacy issues  
7 but will take place after baseline measures for this study, thereby excluding many of these  
8 people whose participation would otherwise provide valuable insights into the effectiveness  
9 and acceptability of PROMs in routine clinical care.  
10  
11

## 12 **CONCLUSION**

13 We describe a study designed to determine the effect of PROMs as part of routine care in  
14 HIV outpatient clinics on quality of HIV care as experienced by patients. The study will  
15 explore differences in patients who participate in PROMs versus those who do not.  
16  
17

## 18 **Patient and public involvement**

19 The PROMs for routine clinical care were selected with input from the Dutch national HIV  
20 patient association. Patients will be involved in piloting the clinical protocol and in the co-  
21 creation of tools to support PROMs health literacy, which should lead to increased patient  
22 satisfaction. [31]  
23  
24

## 25 **Ethics and dissemination**

26 Consent for the collection and analysis of PROMs data falls under the policy of written  
27 consent that patients provide to Stichting HIV Monitoring (SHM) to gather and analyse  
28 pseudonymised data for HIV patients in The Netherlands as part of the ATHENA cohort, for  
29 which virtually all patients have provided consent. [32] We will report on the analysis of the  
30 baseline data, as well as results after Year 1 and Year 2.  
31  
32

## 33 **Authors Contributions**

34 KM, PTN, MB, JN, AW, KS, SEG and MvdV contributed to the conception of the study.  
35 MvdV is the study chief investigator. PTN performed the power analysis. KM and PTN  
36 prepared the first draft of the manuscript for publication. KM is responsible for the study  
37 management, with oversight by MvdV, SEG, PTN and MB. All authors contributed to  
38 revising the manuscript and approved the final version to be published.  
39  
40

## 41 **Funding statement**

42 This work has been supported in part by unrestricted grants from Gilead Sciences and ViiV  
43 Healthcare.  
44  
45

## 46 **References**

- 47  
48 1. van Sighem AI, Gras L, Reiss P, Brinkman K, de Wolf F, on behalf of the ATHENA  
49 national observational cohort study. Life expectancy of recently diagnosed asymptomatic  
50 HIV-infected patients approaches that of uninfected individuals. *AIDS* 2010;24(10):1527-  
51 1535. doi:10.1097/QAD.0b013e32833a3946.  
52  
53 2. van Sighem AI, Wit FWNM, Boyd A, Smit C, Matser A, van der Valk M. Monitoring  
54 Report 2021. Human Immunodeficiency Virus (HIV) Infection in the Netherlands. Stichting  
55 HIV Monitoring, 2021. [https://www.hiv-  
56 monitoring.nl/application/files/1816/6851/5357/NL\\_HIV\\_MONITORING\\_REPORT\\_2022.p  
57 df](https://www.hiv-monitoring.nl/application/files/1816/6851/5357/NL_HIV_MONITORING_REPORT_2022.pdf). Accessed 20 Feb 2023.  
58  
59 3. Nanni MG, Caruso R, Mitchell AJ, Meggiolaro E, Grassi L. Depression in HIV infected  
60 patients: a review. *Curr Psychiatry Rep.* 2015;17(1):530. doi:10.1007/s11920-014-0530-4.

- 1  
2  
3  
4  
5  
6  
7  
8  
9  
10  
11  
12  
13  
14  
15  
16  
17  
18  
19  
20  
21  
22  
23  
24  
25  
26  
27  
28  
29  
30  
31  
32  
33  
34  
35  
36  
37  
38  
39  
40  
41  
42  
43  
44  
45  
46  
47  
48  
49  
50  
51  
52  
53  
54  
55  
56  
57  
58  
59  
60
4. Nyblade L, Mingkwan P, Stockton MA. Stigma reduction: an essential ingredient to ending AIDS by 2030. *Lancet HIV*. 2021;8(2):e106-e113. doi:10.1016/S2352-3018(20)30309-X.
5. Turan JM, Elafros MA, Logie CH, Banik S, Turan B, Crockett KB, et al. Challenges and opportunities in examining and addressing intersectional stigma and health. *BMC Med*. 2019;17(1):7. doi:10.1186/s12916-018-1246-9.
6. Logie CH, Wang Y, Lacombe-Duncan A, Wagner AC, Kaida A, Conway T, Webster K, de Pokomandy A, Loutfy MR. HIV-related stigma, racial discrimination, and gender discrimination: Pathways to physical and mental health-related quality of life among a national cohort of women living with HIV. *Prev Med*. 2018;107:36-44. doi:10.1016/j.ypmed.2017.12.018.
7. Engelhard EAN, Smit C, van Dijk PR, Kuijper TM, Wermeling PR, Weel AE, de Boer MR, Brinkman K, Geerlings SE, Nieuwkerk PT. Health-related quality of life of people with HIV: an assessment of patient related factors and comparison with other chronic diseases. *AIDS*. 2018;32(1):103-112. doi:10.1097/QAD.0000000000001672.
8. Kall M, Marcellin F, Harding R, Lazarus JV, Carrieri P. Patient-reported outcomes to enhance person-centred HIV care. *Lancet HIV*. 2020;7(1):e59-e68. doi:10.1016/S2352-3018(19)30345-5.
9. Lavalley DC, Chenok KE, Love RM, Petersen C, Holve E, Segal CD, et al. Incorporating Patient-Reported Outcomes Into Health Care To Engage Patients And Enhance Care. *Health Aff (Millwood)*. 2016;35(4):575-582. doi: 10.1377/hlthaff.2015.1362.
10. Bouazza YB, Chiari I, El Kharbouchi O, De Backer L, Vanhoutte G, Janssens A, Van Meerbeeck JP. Patient-reported outcome measures (PROMs) in the management of lung cancer: A systematic review. *Lung Cancer*. 2017;113:140-151. doi:10.1016/j.lungcan.2017.09.011.
11. Greenhalgh J, Gooding K, Gibbons E, Dalkin S, Wright J, Valderas J, Black N. How do patient reported outcome measures (PROMs) support clinician-patient communication and patient care? A realist synthesis. *J Patient Rep Outcomes*. 2018;2:42. doi:10.1186/s41687-018-0061-6.
12. Detmar SB, Muller MJ, Schornagel JH, Wever LD, Aaronson NK. Health-related quality-of-life assessments and patient-physician communication: a randomized controlled trial. *JAMA*. 2002;288(23):3027-3034. doi:10.1001/jama.288.23.3027.
13. Velikova G, Booth L, Smith AB, et al. Measuring quality of life in routine oncology practice improves communication and patient well-being: a randomized controlled trial. *J Clin Oncol*. 2004;22(4):714-724. doi:10.1200/JCO.2004.06.078.
14. Gibbons C, Porter I, Gonçalves-Bradley DC, Stoilov S, Ricci-Cabello I, Tsangaris E, et al. Routine provision of feedback from patient-reported outcome measurements to healthcare providers and patients in clinical practice. *Cochrane Database Syst Rev*. 2021;10(10):CD011589. doi:10.1002/14651858.CD011589.pub2.
15. Short D, Fredericksen RJ, Crane HM, Fitzsimmons E, Suri S, Bacon J, et al. Utility and Impact of the Implementation of Same-Day, Self-administered Electronic Patient-Reported Outcomes Assessments in Routine HIV Care in two North American Clinics. *AIDS Behav*. 2022;26(7):2409-2424. doi:10.1007/s10461-022-03585-w.
16. Kjær ASHK, Rasmussen TA, Hjollund NH, Rodkjaer LO, Storgaard M. Patient-reported outcomes in daily clinical practice in HIV outpatient care. *Int J Infect Dis*. 2018;69:108-114. doi:10.1016/j.ijid.2018.02.015.
17. Monroe AK, Jabour SM, Peña S, Keruly JC, Moore RD, Chander G, et al. A qualitative study examining the benefits and challenges of incorporating patient-reported outcome substance use and mental health questionnaires into clinical practice to improve outcomes on

- 1  
2  
3 the HIV care continuum BMC Health Serv Res. 2018;18(1):419. doi:10.1186/s12913-018-  
4 3203-x.
- 5 18. Valderas JM, Kotzeva A, Espallargues M, Guyatt G, Ferrans CE, Halyard MY, et al. The  
6 impact of measuring patient-reported outcomes in clinical practice: a systematic review of the  
7 literature. Qual Life Res. 2008;17(2):179-193. doi:10.1007/s11136-007-9295-0.
- 8 19. Kotronoulas G, Kearney N, Maguire R, Harrow A, Di Domenico C, Croy S, et al. What is  
9 the value of the routine use of patient-reported outcome measures toward improvement of  
10 patient outcomes, processes of care, and health service outcomes in cancer care? A  
11 systematic review of controlled trials. J Clin Oncol. 2014;32(14):1480-1501.  
12 doi:10.1200/JCO.2013.53.5948.
- 13 20. Cella D, Gershon R, Lai JS, Choi S. The future of outcomes measurement: item banking,  
14 tailored short-forms, and computerized adaptive assessment. Qual Life Res. 2007;16 Suppl  
15 1:133-41. doi:10.1007/s11136-007-9204-6.
- 16 21. Segawa E, Schalet B, Cella D. A comparison of computer adaptive tests (CATs) and short  
17 forms in terms of accuracy and number of items administered using PROMIS profile. Qual  
18 Life Res. 2020;29(1):213-221. doi:10.1007/s11136-019-02312-8.
- 19 22. Cramm JM, Nieboer AP. Factorial validation of the Patient Assessment of Chronic Illness  
20 Care (PACIC) and PACIC short version (PACIC-S) among cardiovascular disease patients in  
21 the Netherlands. Health Qual Life Outcomes. 2012;10:104. doi:10.1186/1477-7525-10-104.
- 22 23. Schmittiel J, Mosen DM, Glasgow RE, Hibbard J, Remmers C, Bellows J. Patient  
23 Assessment of Chronic Illness Care (PACIC) and improved patient-centered outcomes for  
24 chronic conditions. J Gen Intern Med. 2008;23(1):77-80. doi:10.1007/s11606-007-0452-5.
- 25 24. Desmedt M, Vertriest S, Petrovic M, Bergs J, Vrijhoef H, Dessers E, et al. Seen through  
26 the patients' eyes: quality of chronic illness care. Fam Pract. 2018;35(4):446-451.  
27 doi:10.1093/fampra/cmz123.
- 28 25. Randell RL, Long MD, Martin CF, Sandler RS, Chen W, Anton K, et al. Patient  
29 perception of chronic illness care in a large inflammatory bowel disease cohort. Inflamm  
30 Bowel Dis. 2013;19(7):1428-1433. doi:10.1097/MIB.0b013e3182813434.
- 31 26. Cohen J. Statistical power analysis for the behavioural sciences. Mahwah, NJ: Erlbaum;  
32 1988.
- 33 27. Killip S, Mahfoud Z, Pearce K. What Is an Intraclass Correlation Coefficient? Crucial  
34 Concepts for Primary Care Researchers. Ann Fam Med. 2004;2(3):204-208. doi:  
35 10.1370/afm.141.
- 36 28. Crane HM, Lober W, Webster E, Harrington RD, Crane PK, Davis TE, Kitahata MM.  
37 Routine collection of patient-reported outcomes in an HIV clinic setting: the first 100  
38 patients. Curr HIV Res. 2007;5(1):109-118. doi:10.2174/157016207779316369.
- 39 29. Crane HM, Crane PK, Tufano JT, Ralston JD, Wilson IB, Brown TD, et al. HIV Provider  
40 Documentation and Actions Following Patient Reports of At-risk Behaviors and Conditions  
41 When Identified by a Web-Based Point-of-Care Assessment AIDS Behav. 2017;21(11):3111-  
42 3121. doi:10.1007/s10461-017-1718-5.
- 43 30. van Muilekom MM, Teela L, van Oers HA, van Goudoever JB, Grootenhuis MA,  
44 Haverman L. Patients' and parents' perspective on the implementation of Patient Reported  
45 Outcome Measures in pediatric clinical practice using the KLIK PROM portal [published  
46 correction appears in Qual Life Res. 2022 Jan 20]. Qual Life Res. 2022;31(1):241-254.  
47 doi:10.1007/s11136-021-02950-x.
- 48 31. Lim S, Morris H, Pizzirani B, Kajewski D, Lee WK, Skouteris H. Evaluating hospital  
49 tools and services that were co-produced with patients: A rapid review. Int J Qual Health  
50 Care. 2020;32(4):231-239. doi:10.1093/intqhc/mzaa020.
- 51  
52  
53  
54  
55  
56  
57  
58  
59  
60

1  
2  
3 32. Boender TS, Smit C, Sighem A, Bezemer D, Ester CJ, Zaheri S, et al. AIDS Therapy  
4 Evaluation in the Netherlands (ATHENA) national observational HIV cohort: cohort profile.  
5 BMJ Open. 2018;8(9):e022516. doi:10.1136/bmjopen-2018-022516.  
6  
7  
8  
9  
10  
11  
12  
13  
14  
15  
16  
17  
18  
19  
20  
21  
22  
23  
24  
25  
26  
27  
28  
29  
30  
31  
32  
33  
34  
35  
36  
37  
38  
39  
40  
41  
42  
43  
44  
45  
46  
47  
48  
49  
50  
51  
52  
53  
54  
55  
56  
57  
58  
59  
60

For peer review only

1  
2  
3  
4  
5  
6  
7  
8  
9  
10  
11  
12  
13  
14  
15  
16  
17  
18  
19  
20  
21  
22  
23  
24  
25  
26  
27  
28  
29  
30  
31  
32  
33  
34  
35  
36  
37  
38  
39  
40  
41  
42  
43  
44  
45  
46  
47  
48  
49  
50  
51  
52  
53  
54  
55  
56  
57  
58  
59  
60

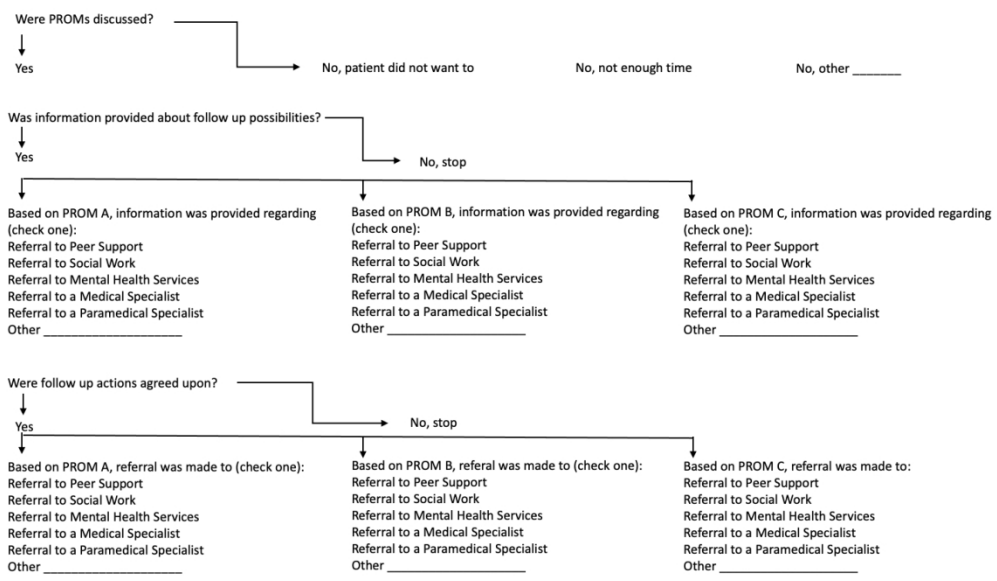

Figure 1: Individualised Care Plan Flowchart

305x178mm (120 x 120 DPI)

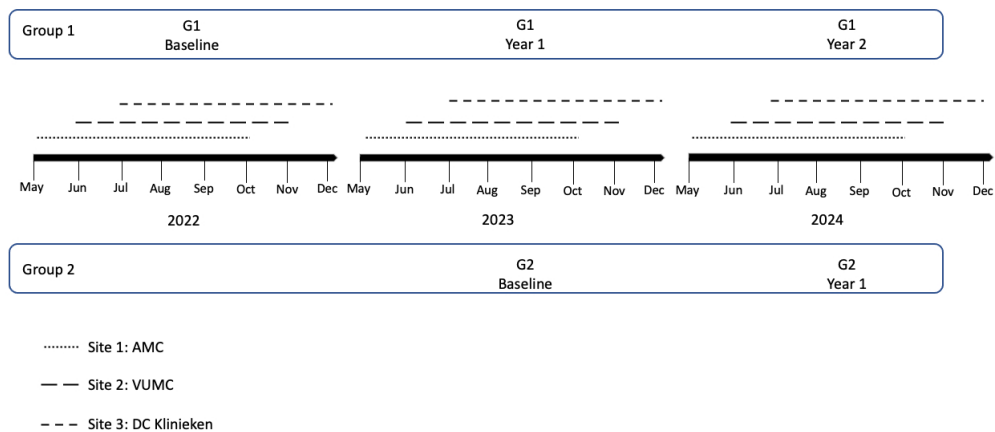

Figure 2: Study timeline and data collection points

263x121mm (120 x 120 DPI)

1  
2  
3 **Optimising HIV care using information obtained from PROMs: Protocol for an**  
4 **observational study.**  
5

6  
7 **Supplement**  
8

9 **Appendix 1: Numbers of patients, doctors, and nurses per site**  
10

11

| Site         | Patients | Doctors                | Nurses |
|--------------|----------|------------------------|--------|
| AMC          | 2255     | 13 plus 1 to 3 fellows | 6      |
| VUMC         | 598      | 4 plus 2 fellows       | 3      |
| DC Klinieken | 1031     | 4                      | 3      |

12  
13  
14  
15  
16  
17  
18  
19  
20  
21  
22  
23  
24  
25  
26  
27  
28  
29  
30  
31  
32  
33  
34  
35  
36  
37  
38  
39  
40  
41  
42  
43  
44  
45  
46  
47  
48  
49  
50  
51  
52  
53  
54  
55  
56  
57  
58  
59  
60

## Appendix 2: PROMs used in the outpatient clinics

Six PROMIS CAT domains were chosen for anxiety, depression, fatigue, physical functioning, sleep disturbances and social isolation. In the DC Klinieken site, we used the PROMIS social isolation 8-item short because the CAT version was not available for its electronic patient portal.

The five-item Medication Adherence Report Scale (MARS) was selected to assess adherence. We chose two subscales of the short Berger HIV Stigma to assess disclosure concerns and negative self-image, along with two screening questions added by community partners the Dutch HIV Association and Shiva: “HIV is a punishment” and “HIV can happen to anybody”. We introduced a screening process for the Alcohol Use Disorders Identification Test (AUDIT) to allow patients who never drink alcohol and those who drink less than 7 units per week? when they do drink to skip the rest of the instrument. We adapted the Drug Use Disorders Identification Test (DUDIT) with input from Mainline, the Dutch harm reduction organisation, to be less confrontational for our patients and further adapted it to reflect the types of drugs that our patients are most likely to use. We chose the Primary Care PTSD Screen for DSM-5 (PC-PTSD-5) to screen for post-traumatic stress disorder. Internal and external stakeholders developed extra questions for our clinics’ populations to screen for social status, including finances, housing and immigration status, and sexuality.



Appendix 2 Table: PROMs used in the outpatient clinics

| PROM                                                                        | Domain(s)                                                                                                                    | Number of Items                                                                                                      | Scales                                                                                             | Frequency                                                                                    |
|-----------------------------------------------------------------------------|------------------------------------------------------------------------------------------------------------------------------|----------------------------------------------------------------------------------------------------------------------|----------------------------------------------------------------------------------------------------|----------------------------------------------------------------------------------------------|
| PROMIS Adult                                                                | Anxiety(v1.0), depression(v1.0), fatigue(v1.0), physical functioning(v1.2), sleep disturbances(v1.1), social isolation(v1.0) | See Appendix 3 Table: PROMIS Adult versions used in the outpatient clinics for details                               | T-score 10-90; higher is worse, except for physical functioning where higher is better             | Once yearly                                                                                  |
| Medication Adherence Report Scale-5 (MARS-5) <sup>ii</sup>                  | Treatment adherence                                                                                                          | 5                                                                                                                    | Total score 5-25; higher is better                                                                 | On demand for treatment switches, temporary increases in viral load (blips), and pregnancies |
| Berger HIV Stigma Scale (12-item) <sup>iii</sup> adapted                    | HIV Stigma                                                                                                                   | 8                                                                                                                    | Subscale 1, Disclosure: 3-12<br>Subscale 2, Self-stigma: 3-12<br>Subscale 3: n/a<br>No total score | Every three years                                                                            |
| Adapted AUDIT <sup>iv</sup>                                                 | Problematic alcohol use                                                                                                      | 1 screening question<br>1 question with to determine problematic alcohol use<br>10 questions from AUDIT              | Total score 0-40, higher is worse.                                                                 | Once yearly                                                                                  |
| Drug use (adapted from DUDIT) <sup>v</sup>                                  | Drug use                                                                                                                     | 1 screening question<br>1 question with list of drugs patient has had experience with<br>10 questions based on DUDIT | Score 0-6 per question, higher is worse. No total score                                            | Once yearly                                                                                  |
| Social status <sup>vi</sup>                                                 | Finances, housing, migration status                                                                                          | 1                                                                                                                    | N/A                                                                                                | Once yearly                                                                                  |
| Sexuality screening <sup>vii</sup>                                          | Sexuality                                                                                                                    | 4                                                                                                                    | N/A                                                                                                | Once yearly                                                                                  |
| PC-PTSD-5 <sup>viii</sup>                                                   | Post-traumatic stress disorder                                                                                               | 1 screening question, followed by 5 if screening is positive                                                         | Total score 0-5, higher is worse, 3 is an indication of PTSD                                       | Every three years                                                                            |
| Patient Assessment Chronic Illness Care, Short Form (PACIC-S) <sup>ix</sup> | Patient perception of quality of care and patient engagement                                                                 | 11                                                                                                                   | Total score 11-55                                                                                  | Once yearly                                                                                  |

i Hanmer, J., Jensen, R.E. & Rothrock, N. A reporting checklist for HealthMeasures' patient-reported outcomes: ASCQ-Me, Neuro-QoL, NIH Toolbox, and PROMIS. *J Patient Rep Outcomes* 4, 21 (2020). <https://doi.org/10.1186/s41687-020-0176-4>

ii Chan AHY, Horne R, Hankins M, Chisari C. The Medication Adherence Report Scale: A measurement tool for eliciting patients' reports of nonadherence. *Br J Clin Pharmacol.* 2020;86(7):1281-1288. doi:10.1111/bcp.14193.

iii Reinius, M., Wettergren, L., Wiklander, M. et al. Development of a 12-item short version of the HIV stigma scale. *Health Qual Life Outcomes.* 2027;15:115. doi:10.1186/s12955-017-0691-z

iv Saunders JB, Aasland OG, Babor TF, de la Fuente JR, Grant M. Development of the Alcohol Use Disorders Identification Test (AUDIT): WHO Collaborative Project on Early Detection of Persons with Harmful Alcohol Consumption--II. *Addiction.* 1993;88(6):791-804. doi:10.1111/j.1360-0443.1993.tb02093.x. See appendix 4 for our adaptations.

v Dudit available: <https://www.emcdda.europa.eu/system/files/attachments/12173/DUDIT-English-version.pdf>. Accessed 20 Feb 2023. See appendix 5 for our adaptations.

vi Screening question developed by the PROMs Kerngroep, along with a full questionnaire that healthcare workers complete if the screening is positive. See Appendix 6.

vii Questions developed by the PROMs Kerngroep and Champions. See appendix 6.

viii Prins A, Bovin MJ, Smolenski DJ, Marx BP, Kimerling R, Jenkins-Guarnieri MA, Kaloupek DG, Schnurr PP, Kaiser AP, Leyva YE, Tiet QQ. The Primary Care PTSD Screen for DSM-5 (PC-PTSD-5): Development and Evaluation Within a Veteran Primary Care Sample. *J Gen Intern Med.* 2016 Oct;31(10):1206-11. doi: 10.1007/s11606-016-3703-5.

ix Cramm JM, Nieboer AP. Factorial validation of the Patient Assessment of Chronic Illness Care (PACIC) and PACIC short version (PACIC-S) among cardiovascular disease patients in the Netherlands. *Health Qual Life Outcomes.* 2012;10:104. Published 2012 Aug 31. doi:10.1186/1477-7525-10-104

Appendix 3 Table: PROMIS Adult versions used in the outpatient clinics

| Location                               | Type                         | Domain                              | Version                 |     |
|----------------------------------------|------------------------------|-------------------------------------|-------------------------|-----|
| AMC/VUMC                               | English and Dutch<br>CAT     | Anxiety <sup>i</sup>                | 1.0                     |     |
|                                        |                              | Depression <sup>i</sup>             | 1.0                     |     |
|                                        |                              | Fatigue <sup>ii</sup>               | 1.0                     |     |
|                                        |                              | Physical functioning <sup>iii</sup> | 1.2                     |     |
|                                        |                              | Sleep disturbances <sup>iv</sup>    | 1.0                     |     |
| DC Klinieken                           | Dutch<br>CAT                 | Social isolation <sup>v</sup>       | 2.0                     |     |
|                                        |                              | Anxiety <sup>i</sup>                | 1.0                     |     |
|                                        |                              | Depression <sup>i</sup>             | 1.0                     |     |
|                                        |                              | Fatigue <sup>ii</sup>               | 1.0                     |     |
|                                        |                              | Physical functioning <sup>iii</sup> | 1.2                     |     |
|                                        | 8-item short form<br>English | Sleep disturbances <sup>iv</sup>    | 1.0                     |     |
|                                        |                              | Social isolation <sup>v</sup>       | 2.0                     |     |
|                                        |                              | 4-item short form                   | Anxiety <sup>i</sup>    | 1.0 |
|                                        |                              |                                     | Depression <sup>i</sup> | 1.0 |
|                                        |                              |                                     | Fatigue <sup>iii</sup>  | 1.0 |
| Physical functioning <sup>vi,vii</sup> | 2.0                          |                                     |                         |     |
| Sleep disturbances <sup>viii</sup>     | 1.0                          |                                     |                         |     |
|                                        |                              | Social isolation <sup>v</sup>       | 2.0                     |     |

i. Pilkonis PA, Choi SW, Reise SP, Stover AM, Riley WT, Cella D, et al. Item banks for measuring emotional distress from the Patient-Reported Outcomes Measurement Information System (PROMIS®): depression, anxiety, and anger. *Assessment*. 2011;18(3):263-283. doi:10.1177/1073191111411667

ii. Lai JS, Cella D, Choi S, Junghaenel DU, Christodoulou C, Gershon R, et al. How item banks and their application can influence measurement practice in rehabilitation medicine: a PROMIS fatigue item bank example. *Arch Phys Med Rehabil*. 2011 Oct;92(10 Suppl):S20-7. doi:10.1016/j.apmr.2010.08.033.

iii. Rose M, Bjorner JB, Gandek B, Bruce B, Fries JF, Ware JE Jr. The PROMIS Physical Function item bank was calibrated to a standardized metric and shown to improve measurement efficiency. *J Clin Epidemiol*. 2014 May;67(5):516-26. doi: 10.1016/j.jclinepi.2013.10.024.

iv. Buysse DJ, Yu L, Moul DE, Germain A, Stover A, Dodds NE, et al. Development and validation of patient-reported outcome measures for sleep disturbance and sleep-related impairments. *Sleep*. 2010 Jun;33(6):781-92. doi: 10.1093/sleep/33.6.781.

v. Hahn EA, DeWalt DA, Bode RK, Garcia SF, DeVellis RF, Correia H, et al. New English and Spanish social health measures will facilitate evaluating health determinants. *Health Psychol*. 2014 May;33(5):490-9. doi: 10.1037/hea0000055.

vi. Rose M, Bjorner JB, Gandek B, Bruce B, Fries JF, Ware JE Jr. The PROMIS Physical Function item bank was calibrated to a standardized metric and shown to improve measurement efficiency. *J Clin Epidemiol*. 2014 May;67(5):516-26. doi: 10.1016/j.jclinepi.2013.10.024.

vii. Schalet BD., Kaat A, Vrahas M, Buckenmaier III CT, Barnhill R, Gershon RC. Extending the ceiling of an item bank: Development of above-average physical function items for PROMIS. In *Quality of Life Research*. 2016; 25:109. doi:10.1007/s11136-016-1390-7.

viii. Yu L, Buysse DJ, Germain A, Moul DE, Stover A, Dodds NE, et al. Development of short forms from the PROMIS™ sleep disturbance and Sleep-Related Impairment item banks. *Behav Sleep Med*. 2011;10(1):6-24. doi:10.1080/15402002.2012.636266.

#### Appendix 4 – Adapted 12-item Berger HIV Stigma Scale

We used 2 subscales from the 12-item Berger HIV Stigma Scale: disclosure concerns and negative self-image. We then added 2 additional questions based on input from community partners to form a third subscale.

| Answers for all questions: | Scores |
|----------------------------|--------|
| Strongly agree             | 4      |
| Agree                      | 3      |
| Disagree                   | 2      |
| Strongly disagree          | 1      |

##### Subscale 1: Disclosure concerns:

1. Telling someone I have HIV is risky
2. I work hard to keep my HIV a secret
3. I am very careful who I tell that I have HIV

##### Subscale 2: Negative self-image

4. I feel guilty because I have HIV
5. People's attitudes about HIV make me feel worse about myself
6. I feel I'm not as good a person as others because I have HIV

##### Subscale 3: Added questions

7. HIV is a punishment.
8. HIV can happen to anyone.

### Appendix 5 – Adapted AUDIT

We adapted the AUDIT to allow for non-drinkers and those who drink less than 7 units per week to skip the entire questionnaire.

The first question offered to the patient is:

Do you drink alcohol?

If the answer is never, the questionnaire stops.

If the answer is one of the possible responses (monthly or less, two to four times a month, two to three times a week, four or more times a week), the patient is offered the second question:

How many units of alcohol do you drink per week?"

The responses "1 or 2", "3 or 4", and "5 or 6" stop the questionnaire. If the patient responds "7 to 9" or "10 or more", the patient is offered the rest of the questions in the AUDIT, as described in:

Saunders JB, Aasland OG, Babor TF, de la Fuente JR, Grant M. Development of the Alcohol Use Disorders Identification Test (AUDIT): WHO Collaborative Project on Early Detection of Persons with Harmful Alcohol Consumption--II. *Addiction*. 1993;88(6):791-804. doi:10.1111/j.1360-0443.1993.tb02093.x

### Appendix 6 – Drug use (Adapted from DUDIT)

Patients are offered the first question of the DUDIT “How often do you use drugs other than alcohol?”. If the answer is “never”, the questionnaire stops. All other answers trigger the rest of the questionnaire, which can be found at <https://www.emcdda.europa.eu/system/files/attachments/12173/DUDIT-English-version.pdf>.

A list of drugs is offered to the patient with the question “What drugs have you ever tried?”. This list is based on feedback from community partners:

Cannabis  
Poppers  
Laughing gas  
XTC MDMA  
GHB  
GBL  
Ketamine  
Snort cocaine  
Speed  
Crystal meth (Tina, T, glass, ice)  
4-MEC  
4-FA (4-FMP)  
3-MEC  
3-MMC  
2C-B  
MXE  
LSD  
mushrooms  
Crack/ base coke  
Heroine  
other: .....

For peer review only

### Appendix 7 – Social status screening questions

We developed a question to screen for problems related to housing, financial status, and migration status:

Do you experience any problems regarding housing, income and/or legal status? Yes/No

A positive answer triggers the HCP to fill in a form that can be used by nurses and the medical social worker to address patients' needs.

For peer review only

## Appendix 8 – Sexuality

The following questions were developed by nurses to ask about sexuality and relationships:

### Sexual health

1. Are you content about your sexual health in the past year? Yes/No/ NA
2. Do you experience any problems related to your sexuality or your sexual health at the moment? Yes/No/NA
3. Do you want to talk about your sexuality or sexual health at your next appointment? Yes/No/NA

### Relationships

1. Does living with HIV influence you in getting into intimate relationships? Yes/ No/NA

# BMJ Open

## Optimising HIV care using information obtained from PROMs: Protocol for an observational study.

|                                 |                                                                                                                                                                                                                                                                                                                                                                                                                                                                                                                                                                                                                                                                                                                                                                                                                                                                                                                                                                                                                                                                                                                                                                                                                                                                                                                                                                                                                                                                                                                                                                                                                                                                                                                                                                                                                                                                                                                                                                                                                                                                                                                                                                                                                                                                                                                                                       |
|---------------------------------|-------------------------------------------------------------------------------------------------------------------------------------------------------------------------------------------------------------------------------------------------------------------------------------------------------------------------------------------------------------------------------------------------------------------------------------------------------------------------------------------------------------------------------------------------------------------------------------------------------------------------------------------------------------------------------------------------------------------------------------------------------------------------------------------------------------------------------------------------------------------------------------------------------------------------------------------------------------------------------------------------------------------------------------------------------------------------------------------------------------------------------------------------------------------------------------------------------------------------------------------------------------------------------------------------------------------------------------------------------------------------------------------------------------------------------------------------------------------------------------------------------------------------------------------------------------------------------------------------------------------------------------------------------------------------------------------------------------------------------------------------------------------------------------------------------------------------------------------------------------------------------------------------------------------------------------------------------------------------------------------------------------------------------------------------------------------------------------------------------------------------------------------------------------------------------------------------------------------------------------------------------------------------------------------------------------------------------------------------------|
| Journal:                        | <i>BMJ Open</i>                                                                                                                                                                                                                                                                                                                                                                                                                                                                                                                                                                                                                                                                                                                                                                                                                                                                                                                                                                                                                                                                                                                                                                                                                                                                                                                                                                                                                                                                                                                                                                                                                                                                                                                                                                                                                                                                                                                                                                                                                                                                                                                                                                                                                                                                                                                                       |
| Manuscript ID                   | bmjopen-2023-073758.R1                                                                                                                                                                                                                                                                                                                                                                                                                                                                                                                                                                                                                                                                                                                                                                                                                                                                                                                                                                                                                                                                                                                                                                                                                                                                                                                                                                                                                                                                                                                                                                                                                                                                                                                                                                                                                                                                                                                                                                                                                                                                                                                                                                                                                                                                                                                                |
| Article Type:                   | Protocol                                                                                                                                                                                                                                                                                                                                                                                                                                                                                                                                                                                                                                                                                                                                                                                                                                                                                                                                                                                                                                                                                                                                                                                                                                                                                                                                                                                                                                                                                                                                                                                                                                                                                                                                                                                                                                                                                                                                                                                                                                                                                                                                                                                                                                                                                                                                              |
| Date Submitted by the Author:   | 21-Jul-2023                                                                                                                                                                                                                                                                                                                                                                                                                                                                                                                                                                                                                                                                                                                                                                                                                                                                                                                                                                                                                                                                                                                                                                                                                                                                                                                                                                                                                                                                                                                                                                                                                                                                                                                                                                                                                                                                                                                                                                                                                                                                                                                                                                                                                                                                                                                                           |
| Complete List of Authors:       | <p>Moody, Kevin; Amsterdam UMC, University of Amsterdam, Department of Internal Medicine, Division of Infectious Diseases, Amsterdam Institute for Infection and Immunology; Amsterdam Public Health Research Institute</p> <p>Nieuwkerk, P.T.; Amsterdam UMC, University of Amsterdam, Department of Medical Psychology, Amsterdam Institute for Infection and Immunology; Amsterdam Public Health Research Institute</p> <p>Bedert, Maarten; Amsterdam UMC, University of Amsterdam, Department of Internal Medicine, Division of Infectious Diseases, Amsterdam Institute for Infection and Immunology</p> <p>Nellen, Jeannine; Amsterdam UMC, University of Amsterdam, Department of Internal Medicine, Division of Infectious Diseases, Amsterdam Institute for Infection and Immunology</p> <p>Weijnsfeld, Annouschka; Amsterdam UMC, University of Amsterdam, Department of Internal Medicine, Division of Infectious Diseases</p> <p>Sigaloff, Kim; Amsterdam UMC, Vrije Universiteit, Department of Internal Medicine, Division of Infectious Diseases, Amsterdam Institute for Infection and Immunology</p> <p>Laan, Laura; Amsterdam UMC, Vrije Universiteit, Department of Internal Medicine, Division of Infectious Diseases</p> <p>Bruins, Claire; Amsterdam UMC, University of Amsterdam, Department of Internal Medicine, Division of Infectious Diseases</p> <p>van Oers, Hedy; Amsterdam UMC, University of Amsterdam, Child and Adolescent Psychiatry &amp; Psychological Care, Emma Children's Hospital, Amsterdam Reproduction and Development; Amsterdam Public Health Research Institute</p> <p>Haverman, Lotte; Amsterdam UMC, University of Amsterdam, Child and Adolescent Psychiatry &amp; Psychological Care, Emma Children's Hospital, Amsterdam Reproduction and Development; Amsterdam Public Health Research Institute</p> <p>Geerlings, Suzanne; Amsterdam UMC, University of Amsterdam, Department of Internal Medicine, Division of Infectious Diseases, Amsterdam Institute for Infection and Immunology; Amsterdam Public Health Research Institute</p> <p>Van der Valk, Marc; Amsterdam UMC, University of Amsterdam, Department of Internal Medicine, Division of Infectious Diseases, Amsterdam Infection &amp; Immunity Institute, Amsterdam Public Health Research Institute; HIV Monitoring Foundation</p> |
| <b>Primary Subject Heading</b>: | HIV/AIDS                                                                                                                                                                                                                                                                                                                                                                                                                                                                                                                                                                                                                                                                                                                                                                                                                                                                                                                                                                                                                                                                                                                                                                                                                                                                                                                                                                                                                                                                                                                                                                                                                                                                                                                                                                                                                                                                                                                                                                                                                                                                                                                                                                                                                                                                                                                                              |



1  
2  
3  
4  
5  
6  
7  
8  
9  
10  
11  
12  
13  
14  
15  
16  
17  
18  
19  
20  
21  
22  
23  
24  
25  
26  
27  
28  
29  
30  
31  
32  
33  
34  
35  
36  
37  
38  
39  
40  
41  
42  
43  
44  
45  
46  
47  
48  
49  
50  
51  
52  
53  
54  
55  
56  
57  
58  
59  
60

|                            |                                                                                                                                                                                   |
|----------------------------|-----------------------------------------------------------------------------------------------------------------------------------------------------------------------------------|
| Secondary Subject Heading: | Patient-centred medicine, Mental health                                                                                                                                           |
| Keywords:                  | Quality of Life, Patient Reported Outcome Measures, HIV & AIDS < INFECTIOUS DISEASES, Quality in health care < HEALTH SERVICES ADMINISTRATION & MANAGEMENT, Patient-Centered Care |
|                            |                                                                                                                                                                                   |



**Optimising HIV care using information obtained from PROMs: Protocol for an observational study.**

|                        |         |                                                                                    |
|------------------------|---------|------------------------------------------------------------------------------------|
| Kevin Moody*           | 1, 2    | <a href="mailto:k.moody@amsterdamumc.nl">k.moody@amsterdamumc.nl</a>               |
| Pythia Nieuwkerk       | 2, 3    | <a href="mailto:p.t.nieuwkerk@amsterdamumc.nl">p.t.nieuwkerk@amsterdamumc.nl</a>   |
| Maarten Bedert         | 1, 2    | <a href="mailto:m.r.d.bedert@amsterdamumc.nl">m.r.d.bedert@amsterdamumc.nl</a>     |
| Jeannine Nellen        | 1       | <a href="mailto:f.j.nellen@amsterdamumc.nl">f.j.nellen@amsterdamumc.nl</a>         |
| Annouschka Weijsenfeld | 1       | <a href="mailto:a.m.wijsenfeld@amsterdamumc.nl">a.m.wijsenfeld@amsterdamumc.nl</a> |
| Kim Sigaloff           | 4       | <a href="mailto:k.sigaloff@amsterdamumc.nl">k.sigaloff@amsterdamumc.nl</a>         |
| Laura Laan             | 4       | <a href="mailto:l.laan1@amsterdamumc.nl">l.laan1@amsterdamumc.nl</a>               |
| Claire Bruins          | 1       | <a href="mailto:c.bruins@amsterdamumc.nl">c.bruins@amsterdamumc.nl</a>             |
| Hedy van Oers          | 2, 5    | <a href="mailto:h.a.vanoers@amsterdamumc.nl">h.a.vanoers@amsterdamumc.nl</a>       |
| Lotte Haverman         | 2, 5    | <a href="mailto:l.haverman@amsterdamumc.nl">l.haverman@amsterdamumc.nl</a>         |
| Suzanne E Geerlings    | 1, 2    | <a href="mailto:s.e.geerlings@amsterdamumc.nl">s.e.geerlings@amsterdamumc.nl</a>   |
| Marc van der Valk      | 1, 2, 6 | <a href="mailto:m.vandervalk@amsterdamumc.nl">m.vandervalk@amsterdamumc.nl</a>     |

1. Amsterdam UMC, University of Amsterdam, Department of Internal Medicine, Division of Infectious Diseases, Amsterdam Institute for Infection and Immunology, Amsterdam, North Holland, Netherlands
2. Amsterdam Public Health Research Institute, Amsterdam, North Holland, Netherlands
3. Amsterdam UMC, University of Amsterdam, Department of Medical Psychology, Amsterdam Institute for Infection and Immunology. Amsterdam, North Holland, Netherlands
4. Amsterdam UMC, Vrije Universiteit, Department of Internal Medicine, Division of Infectious Diseases, Amsterdam Institute for Infection and Immunology Amsterdam, Netherlands
5. Amsterdam UMC, University of Amsterdam, Child and Adolescent Psychiatry & Psychological Care, Emma Children's Hospital, Amsterdam Reproduction and Development, Amsterdam, Netherlands
6. HIV Monitoring Foundation, Amsterdam, Netherlands

\*Corresponding author: Kevin Moody, Amsterdam UMC, University of Amsterdam, Meibergdreef 9, 1105 AZ Amsterdam, Netherlands. Tel: +3120 5664380. No fax number.

**Keywords:** Quality of Life, Patient Reported Outcome Measures, HIV & AIDS (Infectious diseases), Quality in health care (Health services administration and management), Patient-Centered Care

Word count: 2135

## Optimising HIV care using information obtained from PROMs: Protocol for an observational study.

### ABSTRACT (word count 258)

**Introduction** Successful antiviral therapy has transformed human immunodeficiency virus (HIV) infection into a chronic condition, where optimizing quality of life (QoL) has become an essential component of successful lifelong treatment. Patient-reported outcome measures (PROMs) are effective in early signalling of potential physical and mental health problems related to QoL. This study aims to determine whether PROMs in routine clinical care improve quality of care as experienced by people with HIV (PWH).

**Methods and analysis** We report the protocol of a multicentre longitudinal cohort studying PWH at two HIV treatment centres in the Netherlands affiliated with Amsterdam University Medical Centers. Once yearly, PROMs are offered to patients via the patient portal of the electronic health record. PROMs domains include anxiety, depression, fatigue, sleep disturbances, social isolation, physical functioning, stigma, post-traumatic stress disorder, adherence, drug and alcohol use, and screening questions for sexual health and issues related to finances, housing, and migration status. Our intervention comprises: (1) patients' completion of PROMs, (2) discussion of PROMs scores during annual consultations, and (3) documentation of follow-up actions in an individualised care plan, if indicated. The primary endpoint will be patient-experienced quality of care as measured by the Patient Assessment of Chronic Illness Care, Short Form (PACIC-S). Patients will provide measurements at baseline, Year 1, and Year 2. We will explore change over time in PACIC-S and PROMs scores and examine the socio-demographic and HIV-specific characteristics of subgroups of patients who participated in all or only part of the intervention to ascertain whether benefit has been achieved from our intervention in all subgroups.

### Keywords

Quality of Life, HIV & AIDS (Infectious diseases), Patient Reported Outcome Measures, Patient centred care

### Article Summary

- This study's strengths include its multi-site, longitudinal design.
- Accessing linkages to socio-demographic and HIV-specific data facilitates making inferences about obtained benefit based on patient characteristics.
- Our study connects discussing PROMs between patients and healthcare providers in routine clinical care with improvement of patient experience of quality of care.
- The absence of a control group is a limitation of this study.
- Patients with limited literacy, limited digital literacy and limited access to digital health solutions are potentially the people who might benefit most, but they cannot participate in this study.

ARTICLE (word count 2135)

## INTRODUCTION

In the last 40 years the life expectancy of people living with HIV (PWH) has increased immensely due to the availability of safe and effective antiretroviral treatment transforming the condition into a chronic condition. PWH who enter care without severe HIV-associated complications have a similar life expectancy to those without HIV but lack behind in quality of life. [1] PWH are at greater risk of experiencing multiple chronic comorbidities as they age [2], including cardiovascular diseases, cancers, and psychological conditions, such as depression [3]. They might also experience stigma and discrimination due to multiple stigmatised identities, including their HIV disease and characteristics that make them vulnerable to HIV, such as their sexuality or migration status. [4] Together, increased risk of multiple chronic comorbidities and stigma and discrimination can combine to negatively affect the quality of life (QoL) of PWH. [5-7]

Patient-reported outcome measures (PROMs) are validated instruments that measure QoL among specific domains, including physical and mental health functioning, stigma, medication adherence, social status, housing, finances, and sexuality. [8,9] Discussion of PROMs scores between patients and healthcare providers (HCP) as part of routine clinical care for diseases, such as diabetes, arthritis, asthma, cancer, and HIV facilitate shared decision making [9,10]; improve communications between patients and HCP [9-15]; help to signal potential health problems [15,16], including psychosocial issues [11,17,18]; and increase patient satisfaction with care [19].

For routine clinical care in HIV outpatient clinics, earlier studies have shown that PROMs can help identify previously unnoticed physical and mental health problems [16,20] identify problematic substance use [21], improve adherence [15,20], and encourage patient-HCP communication and the development of care plans [22]. In our study, we introduce the PWH perspective by exploring whether engagement in PROMs affects patient-experienced quality of care, which can be linked to patient-centredness, and system-related Chronic Care Model domains as measured by the PACIC-S [23,24].

### Study aims and hypothesis

The primary objective of our study is to determine whether the quality of routine clinical HIV care as perceived by PWH improves with the introduction of PROMs, which involves patients completing PROMs questionnaires, HCP discussing PROMs scores during annual consultations, and documenting follow up actions in individual care plans, if indicated.

We hypothesise that the experience of quality of care among PWH will improve by introducing PROMS to routine HIV care through the early signalling of physical and psychosocial health problems, followed up with subsequent actions, if indicated.

## METHODS AND ANALYSIS

### Setting

This is a multicentre intervention studying PWH in care at two of the HIV treatment centres in Amsterdam the Netherlands that are affiliated with Amsterdam University Medical Centers (AMC site and VUMC site), together taking care of 2853 individuals. We will limit the analyses to individuals who are part of the ongoing ATHENA cohort in which 98% of individuals in care have provided consent. Pseudonymized data transfer and analysis

1  
2  
3 mechanisms for these individuals are managed by Stichting HIV Monitoring on behalf of  
4 ATHENA cohort patients through agreements with all treatment centres in the Netherlands,  
5 including the two involved in this study. [25] Appendix 1 in the supplement provides patient  
6 and HCP details per site.  
7

### 8 9 **Study procedures**

10 PROMs will be sent to people in care once yearly as an integral component of routine care  
11 one to two weeks prior to their consultation and can be completed in their electronic patient  
12 portal. PROMs scores will be discussed with HCP during the annual control consultation.  
13 Physicians and nurses in participating centres work together in fixed pairs, which we consider  
14 clusters for this study.  
15

### 16 17 **Eligibility**

18 Patients 18 years old and above who can engage with healthcare providers in either English  
19 and Dutch and who are registered with the electronic patient portal at Amsterdam UMC will  
20 be offered the PROMs to complete before their annual consultations.  
21

### 22 23 **Recruitment**

24 We will approach consecutive patients in two groups. Group 1 will comprise individuals  
25 whose annual control consultations take place in the first six months after the rollout of  
26 PROMs in the clinics. Rollout will take place sequentially per site. Group 2 will comprise  
27 individuals who were approached but who did not complete PROMs in Year 1. Group 2 will  
28 be offered PROMs once again in Year 2 and followed as a separate group.  
29

### 30 31 **PROMs selected for routine clinical care**

32 We consulted internal and external stakeholders in late 2020 to determine which domains  
33 were most relevant to address the QoL of PWH. Internally, the core team comprising key  
34 HIV nurses, infectious disease physicians, a psychiatrist, a social worker, and a medical  
35 psychologist first assessed the needs of their patient populations and translated these into  
36 QoL domains for which PROMs could be implemented. Externally, these were reviewed and  
37 adapted by representatives from community organisations, including the national association  
38 of PWH (*Hiv vereniging*), an organisation that works with people who use drugs (Mainline),  
39 and by a lawyer specialised in migration law. Members of the PROMs Expertise Centre of  
40 Amsterdam UMC provided technical support on the PROMs that would address those  
41 domains and will provide training to HCP.  
42  
43

44 PROMs domains include anxiety, depression, fatigue, sleep disturbances, social isolation,  
45 physical functioning, stigma, post-traumatic stress disorder, adherence, drug and alcohol use,  
46 and screening questions for sexual health and issues related to finances, housing and  
47 migration status. Appendix 2 in the supplement provides the full list of PROMs selected, their  
48 characteristics, and their sources. Where possible, we selected Patient-Reported Outcomes  
49 Measurement Information System (PROMIS) Computer Adaptive Tests (CATs) for which  
50 the selection of items is tailored to the individual based on responses to prior items. [26] This  
51 minimizes the burden on the patient while providing maximally useful information and  
52 accuracy. [27] Appendix 3 provides technical details of which PROMIS instruments were  
53 used and Appendices 4 to 8 provide details about the questionnaires that we created or  
54 adapted.  
55  
56

### 57 58 **Individualised care plan** 59 60

1  
2  
3 Individual care plans will be completed by the HCP after the PROMs scores have been  
4 discussed at the outpatient clinic. The individual care plans will indicate whether the PROMs  
5 have been discussed and describe types of information provided and/or referrals made to  
6 other departments within the hospital, medical or allied medical services outside the hospital,  
7 or community/peer support. Follow up will take place at the next six-monthly consultation  
8 unless otherwise agreed upon in the consultation.  
9

10  
11 Documentation of the individualised care plan will take place via an electronic form  
12 integrated in the electronic health record at AMC and VUMC that leads the HCP through a  
13 set of questions related to their clinical findings. Figure 1 shows the logic flow that the  
14 template takes to guide the HCP in documenting the individualised care plan. The HCP can  
15 document actions for up to three different PROMs, labelled in Figure 1 as PROM A, PROM  
16 B, and PROM C, that represent quality of life categories triggered by PROMs scores.  
17  
18

19 Figure 1: Individualised care plan flowchart  
20  
21

### 22 **Endpoints**

23 The primary endpoint will be patient-experienced quality of care as measured by the Patient  
24 Assessment of Chronic Illness Care, Short Form (PACIC-S), which measures patients'  
25 experiences with how closely services follow the Chronic Care Model. [23,24] PACIC-S  
26 scores indicating a higher experienced quality of care have been shown to be correlated with  
27 PROMs scores indicating a better quality of life. [24, 28, 29] This questionnaire is delivered  
28 to patients as part of the basic package of PROMs (see Appendix 2 in the supplement). All  
29 other PROMs are secondary outcome measures.  
30  
31

### 32 **Sample size**

33 To be able to detect a change in our primary outcome, the PACIC-S total score, with an effect  
34 size of 0.2 (Cohen's d, small sized effect) [30] from baseline to the follow-up measurements  
35 with 80% power and a two-sided p-value of 0.05, a total of 199 patients would be required.  
36  
37

38 To account for the clustered nature of the data (patients are nested within fixed pairs of  
39 HCPs), we will multiply this sample size by a correction factor of  $1 + (m - 1) \rho$ , where  $m$  is  
40 the mean expected cluster size and  $\rho$  is the anticipated intracluster correlation coefficient.  
41 [31] We assume an intracluster correlation of  $\rho=0.017$  [31]. Assuming we will recruit  $m$  of 13  
42 patients per cluster, the correction factor is 1.204 for the cluster design. To account for the  
43 clustered design, the study would require a total of 240 patients, which we will obtain by  
44 approaching consecutive patients until we reach or surpass this number.  
45  
46

### 47 **Data collection and assessment**

48  
49 Figure 2: Study timeline and data collection points  
50  
51

52 Figure 2 provides the schema for data collection. Group 1 will provide three measurement  
53 moments: G1 baseline, G1 Year 1, and G1 Year 2. Group 2 will provide two measurement  
54 moments: G2 baseline and G2 Year 1.  
55

### 56 **Analysis and statistical considerations**

57  
58 Descriptive statistics  
59  
60

1  
2  
3 Descriptive data will include PROMs scores, demographics – age, sex, gender, location of  
4 treatment centre, country/region of origin – and HIV-specific characteristics – year of  
5 diagnosis, viral load suppressed or not, CD4 count.  
6

#### 7 8 Statistical analysis 9

10 We will compare demographic and HIV-specific characteristics among patients who  
11 complete the PROMs, those who received the PROMs and do not complete them, and those  
12 who were not offered PROMs because they do not have access to the electronic patient  
13 portals. We will determine whether our sample is representative of the total patient  
14 population using chi-squared tests and Student t-tests, analysis of variance (ANOVA) or their  
15 non-parametric counterparts were appropriate.  
16

17  
18 We will analyse changes in the PACIC-S and PROMs scores over time using mixed linear  
19 models. The PACIC-S and the PROMs are the dependent variables. Time will be included as  
20 a categorical fixed factor (baseline, Year 1, Year 2). Repeated measurements will be nested  
21 within participants to account for the clustering of data within participants. We will include a  
22 random intercept on the HCP pairs level to account for the clustering of data within HCP  
23 pairs.  
24

25  
26 We will investigate change over time in PACIC-S and PROMS scores among all patients  
27 who were offered the intervention (intention-to-treat population). Additionally, we will  
28 explore change over time in PACIC-S and PROMS scores among subgroups of patients 1)  
29 with whom PROMS scores were discussed without further follow-up actions, 2) with whom  
30 PROMS scores were discussed with subsequent documentation of follow-up activities within  
31 individualised care plans, and 3) those who completed the PROMs but where the scores were  
32 not discussed with the HCP.  
33

34  
35 To identify socio-demographic/ HIV-specific characteristics significantly associated with  
36 obtaining more or less benefit from PROMs we will conduct series of mixed linear models in  
37 which socio-demographic/ HIV-specific characteristics will be added one by one as fixed  
38 factors to the model that also includes time as fixed factor. The PACIC-S and other PROMS  
39 scores will be the dependent variable. Socio-demographic/ HIV-specific characteristics with a  
40 Wald  $\chi^2$  test p-value  $<0.20$  will be included in further multivariate modelling. Subsequently,  
41 socio-demographic/ HIV-specific characteristics with p-values  $>0.05$  will be removed from  
42 the multivariate model using backward elimination.  
43  
44

45  
46 Two-sided p-values  $<0.05$  are considered to indicate statistical significance. Data analysis  
47 will be conducted using SPSS version 26 and/or Stata version 16.  
48

#### 49 **ETHICS AND DISSEMINATION**

50 Patients provide consent to the ATHENA cohort, which is managed by Stichting HIV  
51 Monitoring that gathers and analyses pseudonymized data for PWH in The Netherlands. We  
52 will report the analysis of the baseline data, as well as results after Year 1 and Year 2.  
53

#### 54 **DISCUSSION**

55  
56 Strengths and Limitations  
57  
58  
59  
60

1  
2  
3 The study's strengths lay in its multi-site, longitudinal design, along with links to socio-  
4 demographic and HIV-specific data, which will allow us to make inferences about obtained  
5 benefit based on patient characteristics and determine how representative our sample is. One  
6 limitation is that this is an observational study. We could have created a control arm where  
7 PROMs scores would be completed but not discussed; however, it is well known that patient  
8 motivation to complete future PROMs diminishes when scores are not discussed. [32]  
9

10  
11 Furthermore, language and literacy are sources of selection bias; up to 40% of our population  
12 cannot engage in Dutch, the only language supported by the patient portal. We recognise that  
13 this population, which is more excluded from society, could be more at risk for the  
14 psychosocial domains that we are trying to capture with PROMs in our clinics. We have  
15 therefore initiated a parallel programme of work to support people with digital, language or  
16 literacy issues, but this will take place after baseline measures for this study, thereby  
17 excluding many of these people whose participation would otherwise provide valuable  
18 insights into the effectiveness and acceptability of PROMs in routine clinical care.  
19

20  
21 In summary, this study aims to show whether discussing PROMs and any subsequent follow-  
22 up actions will lead to an improvement in quality of care, as experienced by PWH in our HIV  
23 outpatient clinics.  
24

### 25 26 **Patient and public involvement**

27 The PROMs for routine clinical care were selected with input from the Dutch national HIV  
28 patient association. Patients will be involved in piloting the clinical protocol and in the co-  
29 creation of tools to support PROMs health literacy, which should lead to increased patient  
30 satisfaction. [33]  
31

### 32 33 **Ethics approval**

34 Patients provide consent to the ATHENA cohort, which is managed by Stichting HIV  
35 Monitoring that gathers and analyses pseudonymized data for PWH in The Netherlands. [25]  
36

### 37 38 **Authors Contributions**

39 KM, PTN, MB, JN, AW, KS, SEG and MvdV contributed to the conception of the study.  
40 MvdV is the study chief investigator. PTN performed the power analysis. KM and PTN  
41 prepared the first draft of the manuscript for publication. KM is responsible for the study  
42 management, with oversight by MvdV, SEG, PTN and MB. All authors contributed to  
43 revising the manuscript and approved the final version to be published.  
44

### 45 46 **Competing Interest**

47 No competing interest.  
48

### 49 50 **Funding statement**

51 This work has been supported in part by unrestricted grants from Gilead Sciences and ViiV  
52 Healthcare.  
53

### 54 55 **References**

56 1. van Sighem AI, Gras L, Reiss P, Brinkman K, de Wolf F, on behalf of the ATHENA  
57 national observational cohort study. Life expectancy of recently diagnosed asymptomatic  
58 HIV-infected patients approaches that of uninfected individuals. *AIDS* 2010;24(10):1527-  
59 1535. doi:10.1097/QAD.0b013e32833a3946.  
60



2. van Sighem AI, Wit FWNM, Boyd A, Smit C, Matser A, van der Valk M. Monitoring Report 2021. Human Immunodeficiency Virus (HIV) Infection in the Netherlands. Stichting HIV Monitoring, 2021. [https://www.hiv-monitoring.nl/application/files/1816/6851/5357/NL\\_HIV\\_MONITORING\\_REPORT\\_2022.pdf](https://www.hiv-monitoring.nl/application/files/1816/6851/5357/NL_HIV_MONITORING_REPORT_2022.pdf). Accessed 20 Feb 2023.
3. Nanni MG, Caruso R, Mitchell AJ, Meggiolaro E, Grassi L. Depression in HIV infected patients: a review. *Curr Psychiatry Rep*. 2015;17(1):530. doi:10.1007/s11920-014-0530-4.
4. Nyblade L, Mingkwan P, Stockton MA. Stigma reduction: an essential ingredient to ending AIDS by 2030. *Lancet HIV*. 2021;8(2):e106-e113. doi:10.1016/S2352-3018(20)30309-X.
5. Turan JM, Elafros MA, Logie CH, Banik S, Turan B, Crockett KB, et al. Challenges and opportunities in examining and addressing intersectional stigma and health. *BMC Med*. 2019;17(1):7. doi:10.1186/s12916-018-1246-9.
6. Logie CH, Wang Y, Lacombe-Duncan A, Wagner AC, Kaida A, Conway T, Webster K, de Pokomandy A, Loutfy MR. HIV-related stigma, racial discrimination, and gender discrimination: Pathways to physical and mental health-related quality of life among a national cohort of women living with HIV. *Prev Med*. 2018;107:36-44. doi:10.1016/j.ypmed.2017.12.018.
7. Engelhard EAN, Smit C, van Dijk PR, Kuijper TM, Wermeling PR, Weel AE, de Boer MR, Brinkman K, Geerlings SE, Nieuwkerk PT. Health-related quality of life of people with HIV: an assessment of patient related factors and comparison with other chronic diseases. *AIDS*. 2018;32(1):103-112. doi:10.1097/QAD.0000000000001672.
8. Kall M, Marcellin F, Harding R, Lazarus JV, Carrieri P. Patient-reported outcomes to enhance person-centred HIV care. *Lancet HIV*. 2020;7(1):e59-e68. doi:10.1016/S2352-3018(19)30345-5.
9. Lavalley DC, Chenok KE, Love RM, Petersen C, Holve E, Segal CD, et al. Incorporating Patient-Reported Outcomes Into Health Care To Engage Patients And Enhance Care. *Health Aff (Millwood)*. 2016;35(4):575-582. doi: 10.1377/hlthaff.2015.1362.
10. Bouazza YB, Chiairi I, El Kharbouchi O, De Backer L, Vanhoutte G, Janssens A, Van Meerbeeck JP. Patient-reported outcome measures (PROMs) in the management of lung cancer: A systematic review. *Lung Cancer*. 2017;113:140-151. doi:10.1016/j.lungcan.2017.09.011.
11. Greenhalgh J, Gooding K, Gibbons E, Dalkin S, Wright J, Valderas J, Black N. How do patient reported outcome measures (PROMs) support clinician-patient communication and patient care? A realist synthesis. *J Patient Rep Outcomes*. 2018;2:42. doi:10.1186/s41687-018-0061-6.
12. Detmar SB, Muller MJ, Schornagel JH, Wever LD, Aaronson NK. Health-related quality-of-life assessments and patient-physician communication: a randomized controlled trial. *JAMA*. 2002;288(23):3027-3034. doi:10.1001/jama.288.23.3027.
13. Velikova G, Booth L, Smith AB, et al. Measuring quality of life in routine oncology practice improves communication and patient well-being: a randomized controlled trial. *J Clin Oncol*. 2004;22(4):714-724. doi:10.1200/JCO.2004.06.078.
14. Gibbons C, Porter I, Gonçalves-Bradley DC, Stoilov S, Ricci-Cabello I, Tsangaris E, et al. Routine provision of feedback from patient-reported outcome measurements to healthcare providers and patients in clinical practice. *Cochrane Database Syst Rev*. 2021;10(10):CD011589. doi:10.1002/14651858.CD011589.pub2.
15. Short D, Fredericksen RJ, Crane HM, Fitzsimmons E, Suri S, Bacon J, et al. Utility and Impact of the Implementation of Same-Day, Self-administered Electronic Patient-Reported Outcomes Assessments in Routine HIV Care in two North American Clinics. *AIDS Behav*. 2022;26(7):2409-2424. doi:10.1007/s10461-022-03585-w.

16. Kjær ASHK, Rasmussen TA, Hjollund NH, Rodkjaer LO, Storgaard M. Patient-reported outcomes in daily clinical practice in HIV outpatient care. *Int J Infect Dis.* 2018;69:108-114. doi:10.1016/j.ijid.2018.02.015.
17. Jabour SM, Chander G, Riekert KA, Keruly JC, Herne K, Hutton H, Beach MC, Lau B, Moore RD, Monroe AK. The Patient Reported Outcomes as a Clinical Tool (PROACT) Pilot Study: What Can be Gained by Sharing Computerized Patient-Reported Mental Health and Substance Use Symptoms with Providers in HIV Care? *AIDS Behav.* 2021 Sep;25(9):2963-2972. doi: 10.1007/s10461-021-03175-2.
18. Valderas JM, Kotzeva A, Espallargues M, Guyatt G, Ferrans CE, Halyard MY, et al. The impact of measuring patient-reported outcomes in clinical practice: a systematic review of the literature. *Qual Life Res.* 2008;17(2):179-193. doi:10.1007/s11136-007-9295-0.
19. Kotronoulas G, Kearney N, Maguire R, Harrow A, Di Domenico C, Croy S, et al. What is the value of the routine use of patient-reported outcome measures toward improvement of patient outcomes, processes of care, and health service outcomes in cancer care? A systematic review of controlled trials. *J Clin Oncol.* 2014;32(14):1480-1501. doi:10.1200/JCO.2013.53.5948.
20. Crane HM, Lober W, Webster E, Harrington RD, Crane PK, Davis TE, Kitahata MM. Routine collection of patient-reported outcomes in an HIV clinic setting: the first 100 patients. *Curr HIV Res.* 2007;5(1):109-118. doi:10.2174/157016207779316369.
21. Crane HM, Crane PK, Tufano JT, Ralston JD, Wilson IB, Brown TD, et al. HIV Provider Documentation and Actions Following Patient Reports of At-risk Behaviors and Conditions When Identified by a Web-Based Point-of-Care Assessment *AIDS Behav.* 2017;21(11):3111-3121. doi:10.1007/s10461-017-1718-5.
22. Jabour SM, Chander G, Riekert KA, Keruly JC, Herne K, Hutton H, Beach MC, Lau B, Moore RD, Monroe AK. The Patient Reported Outcomes as a Clinical Tool (PROACT) Pilot Study: What Can be Gained by Sharing Computerized Patient-Reported Mental Health and Substance Use Symptoms with Providers in HIV Care? *AIDS Behav.* 2021 Sep;25(9):2963-2972. doi: 10.1007/s10461-021-03175-2.
23. Cramm JM, Nieboer AP. Factorial validation of the Patient Assessment of Chronic Illness Care (PACIC) and PACIC short version (PACIC-S) among cardiovascular disease patients in the Netherlands. *Health Qual Life Outcomes.* 2012;10:104. doi:10.1186/1477-7525-10-104.
24. Schmittdiel J, Mosen DM, Glasgow RE, Hibbard J, Remmers C, Bellows J. Patient Assessment of Chronic Illness Care (PACIC) and improved patient-centered outcomes for chronic conditions. *J Gen Intern Med.* 2008;23(1):77-80. doi:10.1007/s11606-007-0452-5.
25. Boender TS, Smit C, Sighem A, Bezemer D, Ester CJ, Zaheri S, et al. AIDS Therapy Evaluation in the Netherlands (ATHENA) national observational HIV cohort: cohort profile. *BMJ Open.* 2018;8(9):e022516. doi:10.1136/bmjopen-2018-022516.
26. Randell RL, Long MD, Martin CF, Sandler RS, Chen W, Anton K, et al. Patient perception of chronic illness care in a large inflammatory bowel disease cohort. *Inflamm Bowel Dis.* 2013;19(7):1428-1433. doi:10.1097/MIB.0b013e3182813434.
26. Cella D, Gershon R, Lai JS, Choi S. The future of outcomes measurement: item banking, tailored short-forms, and computerized adaptive assessment. *Qual Life Res.* 2007;16 Suppl 1:133-41. doi:10.1007/s11136-007-9204-6.
27. Segawa E, Schalet B, Cella D. A comparison of computer adaptive tests (CATs) and short forms in terms of accuracy and number of items administered using PROMIS profile. *Qual Life Res.* 2020;29(1):213-221. doi:10.1007/s11136-019-02312-8.
28. Desmedt M, Vertriest S, Petrovic M, Bergs J, Vrijhoef H, Dessers E, et al. Seen through the patients' eyes: quality of chronic illness care. *Fam Pract.* 2018;35(4):446-451. doi:10.1093/fampra/cmz123.

- 1  
2  
3 29. Randell RL, Long MD, Martin CF, Sandler RS, Chen W, Anton K, et al. Patient  
4 perception of chronic illness care in a large inflammatory bowel disease cohort. *Inflamm*  
5 *Bowel Dis.* 2013;19(7):1428-1433. doi:10.1097/MIB.0b013e3182813434.  
6  
7 30. Cohen J. *Statistical power analysis for the behavioural sciences.* Mahwah, NJ: Erlbaum;  
8 1988.  
9 31. Killip S, Mahfoud Z, Pearce K. What Is an Intraclass Correlation Coefficient? Crucial  
10 Concepts for Primary Care Researchers. *Ann Fam Med.* 2004;2(3):204-208. doi:  
11 10.1370/afm.141.  
12 32. van Muilekom MM, Teela L, van Oers HA, van Goudoever JB, Grootenhuis MA,  
13 Haverman L. Patients' and parents' perspective on the implementation of Patient Reported  
14 Outcome Measures in pediatric clinical practice using the KLIK PROM portal [published  
15 correction appears in *Qual Life Res.* 2022 Jan 20]. *Qual Life Res.* 2022;31(1):241-254.  
16 doi:10.1007/s11136-021-02950-x.  
17 33. Lim S, Morris H, Pizzirani B, Kajewski D, Lee WK, Skouteris H. Evaluating hospital  
18 tools and services that were co-produced with patients: A rapid review. *Int J Qual Health*  
19 *Care.* 2020;32(4):231-239. doi:10.1093/intqhc/mzaa020.  
20  
21  
22  
23  
24  
25  
26  
27  
28  
29  
30  
31  
32  
33  
34  
35  
36  
37  
38  
39  
40  
41  
42  
43  
44  
45  
46  
47  
48  
49  
50  
51  
52  
53  
54  
55  
56  
57  
58  
59  
60

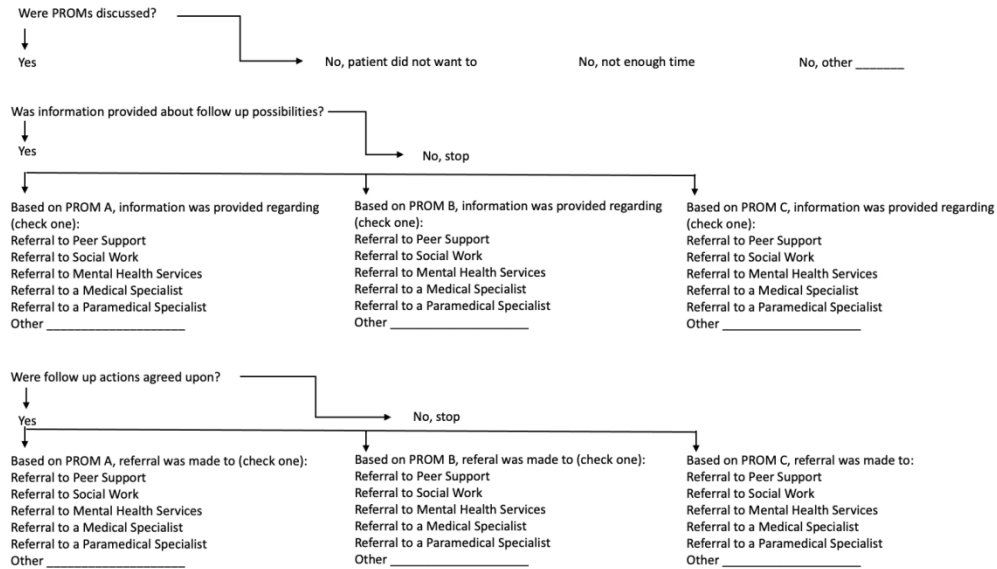

Figure 1: Individualised Care Plan Flowchart

305x178mm (120 x 120 DPI)

1  
2  
3  
4  
5  
6  
7  
8  
9  
10  
11  
12  
13  
14  
15  
16  
17  
18  
19  
20  
21  
22  
23  
24  
25  
26  
27  
28  
29  
30  
31  
32  
33  
34  
35  
36  
37  
38  
39  
40  
41  
42  
43  
44  
45  
46  
47  
48  
49  
50  
51  
52  
53  
54  
55  
56  
57  
58  
59  
60

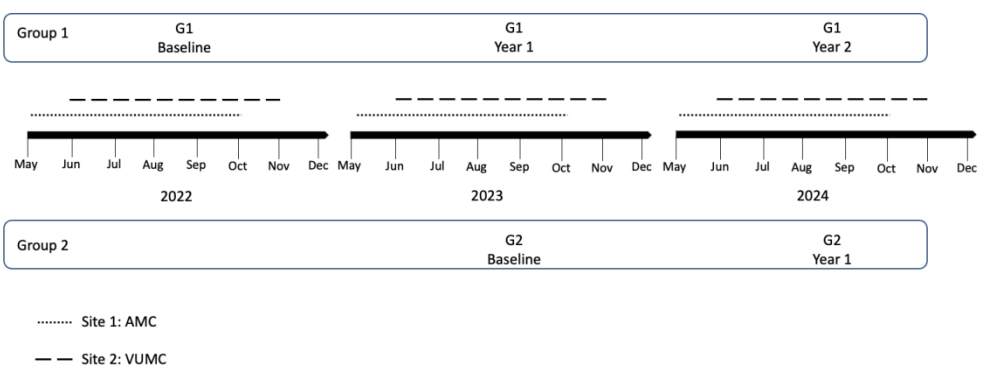

Figure 2: Study timeline and data collection points protocol enrolment

266x101mm (150 x 150 DPI)

1  
2  
3 **Optimising HIV care using information obtained from PROMs: Protocol for an**  
4 **observational study.**  
5  
6

7 **Supplement**  
8

9 **Appendix 1: Numbers of patients, doctors, and nurses per site**  
10

11

| Site | Patients | Doctors                | Nurses |
|------|----------|------------------------|--------|
| AMC  | 2255     | 13 plus 1 to 3 fellows | 6      |
| VUMC | 598      | 4 plus 2 fellows       | 3      |

12  
13  
14  
15  
16  
17  
18  
19  
20  
21  
22  
23  
24  
25  
26  
27  
28  
29  
30  
31  
32  
33  
34  
35  
36  
37  
38  
39  
40  
41  
42  
43  
44  
45  
46  
47  
48  
49  
50  
51  
52  
53  
54  
55  
56  
57  
58  
59  
60

## Appendix 2: PROMs used in the outpatient clinics

Six PROMIS CAT domains were chosen for anxiety, depression, fatigue, physical functioning, sleep disturbances and social isolation. In the DC Klinieken site, we used the PROMIS social isolation 8-item short because the CAT version was not available for its electronic patient portal.

The five-item Medication Adherence Report Scale (MARS) was selected to assess adherence. We chose two subscales of the short Berger HIV Stigma to assess disclosure concerns and negative self-image, along with two screening questions added by community partners the Dutch HIV Association and Shiva: “HIV is a punishment” and “HIV can happen to anybody”. We introduced a screening process for the Alcohol Use Disorders Identification Test (AUDIT) to allow patients who never drink alcohol and those who drink less than 7 units per week? when they do drink to skip the rest of the instrument. We adapted the Drug Use Disorders Identification Test (DUDIT) with input from Mainline, the Dutch harm reduction organisation, to be less confrontational for our patients and further adapted it to reflect the types of drugs that our patients are most likely to use. We chose the Primary Care PTSD Screen for DSM-5 (PC-PTSD-5) to screen for post-traumatic stress disorder. Internal and external stakeholders developed extra questions for our clinics’ populations to screen for social status, including finances, housing and immigration status, and sexuality.

Appendix 2 - Table: PROMs used in the outpatient clinics

| PROM                                                                        | Domain(s)                                                                                                                     | Number of Items                                                                                                      | Scales                                                                                             | Frequency                                                                                    |
|-----------------------------------------------------------------------------|-------------------------------------------------------------------------------------------------------------------------------|----------------------------------------------------------------------------------------------------------------------|----------------------------------------------------------------------------------------------------|----------------------------------------------------------------------------------------------|
| PROMIS Adult                                                                | Anxiety(v1.0), depression(v1.0) , fatigue(v1.0), physical functioning(v1.2), sleep disturbances(v1.1), social isolation(v1.0) | See Appendix 3 Table: PROMIS Adult versions used in the outpatient clinics for details                               | T-score 10-90; higher is worse, except for physical functioning where higher is better             | Once yearly                                                                                  |
| Medication Adherence Report Scale-5 (MARS-5) <sup>ii</sup>                  | Treatment adherence                                                                                                           | 5                                                                                                                    | Total score 5-25; higher is better                                                                 | On demand for treatment switches, temporary increases in viral load (blips), and pregnancies |
| Berger HIV Stigma Scale (12-item) <sup>iii</sup> adapted                    | HIV Stigma                                                                                                                    | 8                                                                                                                    | Subscale 1, Disclosure: 3-12<br>Subscale 2, Self-stigma: 3-12<br>Subscale 3: n/a<br>No total score | Every three years                                                                            |
| Adapted AUDIT <sup>iv</sup>                                                 | Problematic alcohol use                                                                                                       | 1 screening question<br>1 question with to determine problematic alcohol use<br>10 questions from AUDIT              | Total score 0-40, higher is worse.                                                                 | Once yearly                                                                                  |
| Drug use (adapted from DUDIT) <sup>v</sup>                                  | Drug use                                                                                                                      | 1 screening question<br>1 question with list of drugs patient has had experience with<br>10 questions based on DUDIT | Score 0-6 per question, higher is worse. No total score                                            | Once yearly                                                                                  |
| Social status <sup>vi</sup>                                                 | Finances, housing, migration status                                                                                           | 1                                                                                                                    | N/A                                                                                                | Once yearly                                                                                  |
| Sexuality screening <sup>vii</sup>                                          | Sexuality                                                                                                                     | 4                                                                                                                    | N/A                                                                                                | Once yearly                                                                                  |
| PC-PTSD-5 <sup>viii</sup>                                                   | Post-traumatic stress disorder                                                                                                | 1 screening question, followed by 5 if screening is positive                                                         | Total score 0-5, higher is worse, 3 is an indication of PTSD                                       | Every three years                                                                            |
| Patient Assessment Chronic Illness Care, Short Form (PACIC-S) <sup>ix</sup> | Patient perception of quality of care and patient engagement                                                                  | 11                                                                                                                   | Total score 11-55                                                                                  | Once yearly                                                                                  |

i Hanmer, J., Jensen, R.E. & Rothrock, N. A reporting checklist for HealthMeasures' patient-reported outcomes: ASCQ-Me, Neuro-QoL, NIH Toolbox, and PROMIS. *J Patient Rep Outcomes* 4, 21 (2020). <https://doi.org/10.1186/s41687-020-0176-4>

ii Chan AHY, Horne R, Hankins M, Chisari C. The Medication Adherence Report Scale: A measurement tool for eliciting patients' reports of nonadherence. *Br J Clin Pharmacol.* 2020;86(7):1281-1288. doi:10.1111/bcp.14193.

iii Reinius, M., Wettergren, L., Wiklander, M. et al. Development of a 12-item short version of the HIV stigma scale. *Health Qual Life Outcomes.* 2027;15:115). doi:10.1186/s12955-017-0691-z

iv Saunders JB, Aasland OG, Babor TF, de la Fuente JR, Grant M. Development of the Alcohol Use Disorders Identification Test (AUDIT): WHO Collaborative Project on Early Detection of Persons with Harmful Alcohol Consumption--II. *Addiction.* 1993;88(6):791-804. doi:10.1111/j.1360-0443.1993.tb02093.x. See appendix 4 for our adaptations.

v Dudit available: <https://www.emcdda.europa.eu/system/files/attachments/12173/DUDIT-English-version.pdf>. Accessed 20 Feb 2023. See appendix 5 for our adaptations.

vi Screening question developed by the PROMs Kerngroep, along with a full questionnaire that healthcare workers complete if the screening is positive. See Appendix 6.

vii Questions developed by the PROMs Kerngroep and Champions. See appendix 6.

viii Prins A, Bovin MJ, Smolenski DJ, Marx BP, Kimerling R, Jenkins-Guarnieri MA, Kaloupek DG, Schnurr PP, Kaiser AP, Leyva YE, Tiet QQ. The Primary Care PTSD Screen for DSM-5 (PC-PTSD-5): Development and Evaluation Within a Veteran Primary Care Sample. *J Gen Intern Med.* 2016 Oct;31(10):1206-11. doi: 10.1007/s11606-016-3703-5.

ix Cramm JM, Nieboer AP. Factorial validation of the Patient Assessment of Chronic Illness Care (PACIC) and PACIC short version (PACIC-S) among cardiovascular disease patients in the Netherlands. *Health Qual Life Outcomes.* 2012;10:104. Published 2012 Aug 31. doi:10.1186/1477-7525-10-104



## Appendix 3

Table: PROMIS Adult versions used in the outpatient clinics

| Location | Type                     | Domain                              | Version |
|----------|--------------------------|-------------------------------------|---------|
| AMC/VUMC | English and Dutch<br>CAT | Anxiety <sup>i</sup>                | 1.0     |
|          |                          | Depression <sup>i</sup>             | 1.0     |
|          |                          | Fatigue <sup>ii</sup>               | 1.0     |
|          |                          | Physical functioning <sup>iii</sup> | 1.2     |
|          |                          | Sleep disturbances <sup>iv</sup>    | 1.0     |
|          |                          | Social isolation <sup>v</sup>       | 2.0     |

i. Pilkonis PA, Choi SW, Reise SP, Stover AM, Riley WT, Cella D, et al. Item banks for measuring emotional distress from the Patient-Reported Outcomes Measurement Information System (PROMIS®): depression, anxiety, and anger. *Assessment*. 2011;18(3):263-283. doi:10.1177/1073191111411667

ii. Lai JS, Cella D, Choi S, Junghaenel DU, Christodoulou C, Gershon R, et al. How item banks and their application can influence measurement practice in rehabilitation medicine: a PROMIS fatigue item bank example. *Arch Phys Med Rehabil*. 2011 Oct;92(10 Suppl):S20-7. doi:10.1016/j.apmr.2010.08.033.

iii. Rose M, Bjorner JB, Gandek B, Bruce B, Fries JF, Ware JE Jr. The PROMIS Physical Function item bank was calibrated to a standardized metric and shown to improve measurement efficiency. *J Clin Epidemiol*. 2014 May;67(5):516-26. doi: 10.1016/j.jclinepi.2013.10.024.

iv. Buysse DJ, Yu L, Moul DE, Germain A, Stover A, Dodds NE, et al. Development and validation of patient-reported outcome measures for sleep disturbance and sleep-related impairments. *Sleep*. 2010 Jun;33(6):781-92. doi: 10.1093/sleep/33.6.781.

v. Hahn EA, DeWalt DA, Bode RK, Garcia SF, DeVellis RF, Correia H, et al. New English and Spanish social health measures will facilitate evaluating health determinants. *Health Psychol*. 2014 May;33(5):490-9. doi: 10.1037/hea0000055.

#### Appendix 4 – Adapted 12-item Berger HIV Stigma Scale

We used 2 subscales from the 12-item Berger HIV Stigma Scale: disclosure concerns and negative self-image. We then added 2 additional questions based on input from community partners to form a third subscale.

| Answers for all questions: | Scores |
|----------------------------|--------|
| Strongly agree             | 4      |
| Agree                      | 3      |
| Disagree                   | 2      |
| Strongly disagree          | 1      |

##### Subscale 1: Disclosure concerns:

1. Telling someone I have HIV is risky
2. I work hard to keep my HIV a secret
3. I am very careful who I tell that I have HIV

##### Subscale 2: Negative self-image

4. I feel guilty because I have HIV
5. People's attitudes about HIV make me feel worse about myself
6. I feel I'm not as good a person as others because I have HIV

##### Subscale 3: Added questions

7. HIV is a punishment.
8. HIV can happen to anyone.

### Appendix 5 – Adapted AUDIT

We adapted the AUDIT to allow for non-drinkers and those who drink less than 7 units per week to skip the entire questionnaire.

The first question offered to the patient is:

Do you drink alcohol?

If the answer is never, the questionnaire stops.

If the answer is one of the possible responses (monthly or less, two to four times a month, two to three times a week, four or more times a week), the patient is offered the second question:

How many units of alcohol do you drink per week?"

The responses "1 or 2", "3 or 4", and "5 or 6" stop the questionnaire. If the patient responds "7 to 9" or "10 or more", the patient is offered the rest of the questions in the AUDIT, as described in:

Saunders JB, Aasland OG, Babor TF, de la Fuente JR, Grant M. Development of the Alcohol Use Disorders Identification Test (AUDIT): WHO Collaborative Project on Early Detection of Persons with Harmful Alcohol Consumption--II. *Addiction*. 1993;88(6):791-804. doi:10.1111/j.1360-0443.1993.tb02093.x

### Appendix 6– Drug use (Adapted from DUDIT)

Patients are offered the first question of the DUDIT “How often do you use drugs other than alcohol?”. If the answer is “never”, the questionnaire stops. All other answers trigger the rest of the questionnaire, which can be found at <https://www.emcdda.europa.eu/system/files/attachments/12173/DUDIT-English-version.pdf>.

A list of drugs is offered to the patient with the question “What drugs have you ever tried?”. This list is based on feedback from community partners:

Cannabis  
Poppers  
Laughing gas  
XTC MDMA  
GHB  
GBL  
Ketamine  
Snort cocaine  
Speed  
Crystal meth (Tina, T, glass, ice)  
4-MEC  
4-FA (4-FMP)  
3-MEC  
3-MMC  
2C-B  
MXE  
LSD  
mushrooms  
Crack/ base coke  
Heroine  
other: .....

For peer review only

1  
2  
3 **Appendix 7– Social status screening questions**  
4

5 We developed a question to screen for problems related to housing, financial status, and migration  
6 status:  
7

8  
9 Do you experience any problems regarding housing, income and/or legal status? Yes/No  
10

11 A positive answer triggers the HCP to fill in a form that can be used by nurses and the medical social  
12 worker to address patients’ needs.  
13  
14  
15  
16  
17  
18  
19  
20  
21  
22  
23  
24  
25  
26  
27  
28  
29  
30  
31  
32  
33  
34  
35  
36  
37  
38  
39  
40  
41  
42  
43  
44  
45  
46  
47  
48  
49  
50  
51  
52  
53  
54  
55  
56  
57  
58  
59  
60

For peer review only

## Appendix 8 – Sexuality

The following questions were developed by nurses to ask about sexuality and relationships:

### Sexual health

1. Are you content about your sexual health in the past year? Yes/No/ NA
2. Do you experience any problems related to your sexuality or your sexual health at the moment? Yes/No/NA
3. Do you want to talk about your sexuality or sexual health at your next appointment? Yes/No/NA

### Relationships

1. Does living with HIV influence you in getting into intimate relationships? Yes/ No/NA

STROBE Statement—Checklist of items that should be included in reports of *cohort studies*

|                           | Item No | Recommendation                                                                                                                                                                                                                                                                                                         | Page No     |
|---------------------------|---------|------------------------------------------------------------------------------------------------------------------------------------------------------------------------------------------------------------------------------------------------------------------------------------------------------------------------|-------------|
| <b>Title and abstract</b> | 1       | (a) Indicate the study's design with a commonly used term in the title or the abstract<br>(b) Provide in the abstract an informative and balanced summary of what was done and what was found                                                                                                                          | 1<br>3      |
| <b>Introduction</b>       |         |                                                                                                                                                                                                                                                                                                                        |             |
| Background/rationale      | 2       | Explain the scientific background and rationale for the investigation being reported                                                                                                                                                                                                                                   | 3           |
| Objectives                | 3       | State specific objectives, including any prespecified hypotheses                                                                                                                                                                                                                                                       | 3           |
| <b>Methods</b>            |         |                                                                                                                                                                                                                                                                                                                        |             |
| Study design              | 4       | Present key elements of study design early in the paper                                                                                                                                                                                                                                                                | 3-5         |
| Setting                   | 5       | Describe the setting, locations, and relevant dates, including periods of recruitment, exposure, follow-up, and data collection                                                                                                                                                                                        | 3-5         |
| Participants              | 6       | (a) Give the eligibility criteria, and the sources and methods of selection of participants. Describe methods of follow-up<br>(b) For matched studies, give matching criteria and number of exposed and unexposed                                                                                                      | 3, Figure 2 |
| Variables                 | 7       | Clearly define all outcomes, exposures, predictors, potential confounders, and effect modifiers. Give diagnostic criteria, if applicable                                                                                                                                                                               | 5           |
| Data sources/measurement  | 8*      | For each variable of interest, give sources of data and details of methods of assessment (measurement). Describe comparability of assessment methods if there is more than one group                                                                                                                                   | 4-5         |
| Bias                      | 9       | Describe any efforts to address potential sources of bias                                                                                                                                                                                                                                                              | N/A         |
| Study size                | 10      | Explain how the study size was arrived at                                                                                                                                                                                                                                                                              | 4-5         |
| Quantitative variables    | 11      | Explain how quantitative variables were handled in the analyses. If applicable, describe which groupings were chosen and why                                                                                                                                                                                           | 5-6         |
| Statistical methods       | 12      | (a) Describe all statistical methods, including those used to control for confounding<br>(b) Describe any methods used to examine subgroups and interactions<br>(c) Explain how missing data were addressed<br>(d) If applicable, explain how loss to follow-up was addressed<br>(e) Describe any sensitivity analyses | 5-6         |
| <b>Results</b>            |         |                                                                                                                                                                                                                                                                                                                        |             |
| Participants              | 13*     | (a) Report numbers of individuals at each stage of study—eg numbers potentially eligible, examined for eligibility, confirmed eligible, included in the study, completing follow-up, and analysed<br>(b) Give reasons for non-participation at each stage<br>(c) Consider use of a flow diagram                        | N/A         |
| Descriptive data          | 14*     | (a) Give characteristics of study participants (eg demographic, clinical, social) and information on exposures and potential confounders<br>(b) Indicate number of participants with missing data for each variable of interest<br>(c) Summarise follow-up time (eg, average and total amount)                         | N/A         |
| Outcome data              | 15*     | Report numbers of outcome events or summary measures over time                                                                                                                                                                                                                                                         | N/A         |

|    |                          |    |                                                                                                                                                                                                              |     |
|----|--------------------------|----|--------------------------------------------------------------------------------------------------------------------------------------------------------------------------------------------------------------|-----|
| 1  | Main results             | 16 | (a) Give unadjusted estimates and, if applicable, confounder-adjusted estimates and their precision (eg, 95% confidence interval). Make clear which confounders were adjusted for and why they were included | N/A |
| 2  |                          |    | (b) Report category boundaries when continuous variables were categorized                                                                                                                                    |     |
| 3  |                          |    | (c) If relevant, consider translating estimates of relative risk into absolute risk for a meaningful time period                                                                                             |     |
| 4  |                          |    |                                                                                                                                                                                                              |     |
| 5  |                          |    |                                                                                                                                                                                                              |     |
| 6  |                          |    |                                                                                                                                                                                                              |     |
| 7  |                          |    |                                                                                                                                                                                                              |     |
| 8  |                          |    |                                                                                                                                                                                                              |     |
| 9  | Other analyses           | 17 | Report other analyses done—eg analyses of subgroups and interactions, and sensitivity analyses                                                                                                               | N/A |
| 10 |                          |    |                                                                                                                                                                                                              |     |
| 11 | <b>Discussion</b>        |    |                                                                                                                                                                                                              |     |
| 12 |                          |    |                                                                                                                                                                                                              |     |
| 13 | Key results              | 18 | Summarise key results with reference to study objectives                                                                                                                                                     | N/A |
| 14 | Limitations              | 19 | Discuss limitations of the study, taking into account sources of potential bias or imprecision. Discuss both direction and magnitude of any potential bias                                                   | 7   |
| 15 |                          |    |                                                                                                                                                                                                              |     |
| 16 | Interpretation           | 20 | Give a cautious overall interpretation of results considering objectives, limitations, multiplicity of analyses, results from similar studies, and other relevant evidence                                   | N/A |
| 17 |                          |    |                                                                                                                                                                                                              |     |
| 18 |                          |    |                                                                                                                                                                                                              |     |
| 19 | Generalisability         | 21 | Discuss the generalisability (external validity) of the study results                                                                                                                                        | N/A |
| 20 |                          |    |                                                                                                                                                                                                              |     |
| 21 | <b>Other information</b> |    |                                                                                                                                                                                                              |     |
| 22 | Funding                  | 22 | Give the source of funding and the role of the funders for the present study and, if applicable, for the original study on which the present article is based                                                | 7   |
| 23 |                          |    |                                                                                                                                                                                                              |     |
| 24 |                          |    |                                                                                                                                                                                                              |     |

\*Give information separately for exposed and unexposed groups.

**Note:** An Explanation and Elaboration article discusses each checklist item and gives methodological background and published examples of transparent reporting. The STROBE checklist is best used in conjunction with this article (freely available on the Web sites of PLoS Medicine at <http://www.plosmedicine.org/>, Annals of Internal Medicine at <http://www.annals.org/>, and Epidemiology at <http://www.epidem.com/>). Information on the STROBE Initiative is available at <http://www.strobe-statement.org>.



# BMJ Open

## Optimising HIV care using information obtained from PROMs: Protocol for an observational study.

|                                 |                                                                                                                                                                                                                                                                                                                                                                                                                                                                                                                                                                                                                                                                                                                                                                                                                                                                                                                                                                                                                                                                                                                                                                                                                                                                                                                                                                                                                                                                                                                                                                                                                                                                                                                                                                                                                                                    |
|---------------------------------|----------------------------------------------------------------------------------------------------------------------------------------------------------------------------------------------------------------------------------------------------------------------------------------------------------------------------------------------------------------------------------------------------------------------------------------------------------------------------------------------------------------------------------------------------------------------------------------------------------------------------------------------------------------------------------------------------------------------------------------------------------------------------------------------------------------------------------------------------------------------------------------------------------------------------------------------------------------------------------------------------------------------------------------------------------------------------------------------------------------------------------------------------------------------------------------------------------------------------------------------------------------------------------------------------------------------------------------------------------------------------------------------------------------------------------------------------------------------------------------------------------------------------------------------------------------------------------------------------------------------------------------------------------------------------------------------------------------------------------------------------------------------------------------------------------------------------------------------------|
| Journal:                        | <i>BMJ Open</i>                                                                                                                                                                                                                                                                                                                                                                                                                                                                                                                                                                                                                                                                                                                                                                                                                                                                                                                                                                                                                                                                                                                                                                                                                                                                                                                                                                                                                                                                                                                                                                                                                                                                                                                                                                                                                                    |
| Manuscript ID                   | bmjopen-2023-073758.R2                                                                                                                                                                                                                                                                                                                                                                                                                                                                                                                                                                                                                                                                                                                                                                                                                                                                                                                                                                                                                                                                                                                                                                                                                                                                                                                                                                                                                                                                                                                                                                                                                                                                                                                                                                                                                             |
| Article Type:                   | Protocol                                                                                                                                                                                                                                                                                                                                                                                                                                                                                                                                                                                                                                                                                                                                                                                                                                                                                                                                                                                                                                                                                                                                                                                                                                                                                                                                                                                                                                                                                                                                                                                                                                                                                                                                                                                                                                           |
| Date Submitted by the Author:   | 12-Oct-2023                                                                                                                                                                                                                                                                                                                                                                                                                                                                                                                                                                                                                                                                                                                                                                                                                                                                                                                                                                                                                                                                                                                                                                                                                                                                                                                                                                                                                                                                                                                                                                                                                                                                                                                                                                                                                                        |
| Complete List of Authors:       | Moody, Kevin; Amsterdam UMC, University of Amsterdam, Infectious Diseases, and Amsterdam Institute for Infection and Immunology; Amsterdam Public Health Research Institute<br>Nieuwkerk, P.T.; Amsterdam UMC, University of Amsterdam, Department of Medical Psychology, and Amsterdam Institute for Infection and Immunology; Amsterdam Public Health Research Institute<br>Bedert, Maarten; Amsterdam UMC, University of Amsterdam, Infectious Diseases, and Amsterdam Institute for Infection and Immunology<br>Nellen, Jeannine; Amsterdam UMC, University of Amsterdam, Infectious Diseases, and Amsterdam Institute for Infection and Immunology<br>Weijsenfeld, Annouschka; Amsterdam UMC, University of Amsterdam, Infectious Diseases<br>Sigaloff, Kim; Amsterdam UMC, Vrije Universiteit, Infectious Diseases, and Amsterdam Institute for Infection and Immunology<br>Laan, Laura; Amsterdam UMC, Vrije Universiteit, Infectious Diseases<br>Bruins, Claire; Amsterdam UMC, University of Amsterdam, Infectious Diseases<br>van Oers, Hedy; Amsterdam UMC, University of Amsterdam, Child and Adolescent Psychiatry & Psychological Care, Emma Children's Hospital, Amsterdam Reproduction and Development; Amsterdam Public Health Research Institute<br>Haverman, Lotte; Amsterdam UMC, University of Amsterdam, Child and Adolescent Psychiatry & Psychological Care, Emma Children's Hospital, Amsterdam Reproduction and Development; Amsterdam Public Health Research Institute<br>Geerlings, Suzanne; Amsterdam UMC, University of Amsterdam, Infectious Diseases, and Amsterdam Institute for Infection and Immunology; Amsterdam Public Health Research Institute<br>Van der Valk, Marc; Amsterdam UMC, University of Amsterdam, Infectious Diseases, and Amsterdam Infection & Immunity Institute; HIV Monitoring Foundation |
| <b>Primary Subject Heading</b>: | HIV/AIDS                                                                                                                                                                                                                                                                                                                                                                                                                                                                                                                                                                                                                                                                                                                                                                                                                                                                                                                                                                                                                                                                                                                                                                                                                                                                                                                                                                                                                                                                                                                                                                                                                                                                                                                                                                                                                                           |
| Secondary Subject Heading:      | Patient-centred medicine, Mental health                                                                                                                                                                                                                                                                                                                                                                                                                                                                                                                                                                                                                                                                                                                                                                                                                                                                                                                                                                                                                                                                                                                                                                                                                                                                                                                                                                                                                                                                                                                                                                                                                                                                                                                                                                                                            |
| Keywords:                       | Quality of Life, Patient Reported Outcome Measures, HIV & AIDS < INFECTIOUS DISEASES, Quality in health care < HEALTH SERVICES ADMINISTRATION & MANAGEMENT, Patient-Centered Care                                                                                                                                                                                                                                                                                                                                                                                                                                                                                                                                                                                                                                                                                                                                                                                                                                                                                                                                                                                                                                                                                                                                                                                                                                                                                                                                                                                                                                                                                                                                                                                                                                                                  |

1  
2  
3  
4  
5  
6  
7  
8  
9  
10  
11  
12  
13  
14  
15  
16  
17  
18  
19  
20  
21  
22  
23  
24  
25  
26  
27  
28  
29  
30  
31  
32  
33  
34  
35  
36  
37  
38  
39  
40  
41  
42  
43  
44  
45  
46  
47  
48  
49  
50  
51  
52  
53  
54  
55  
56  
57  
58  
59  
60

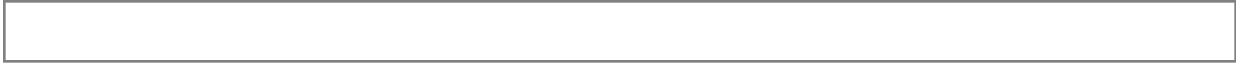

SCHOLARONE™  
Manuscripts

1  
2  
3  
4 **Optimising HIV care using information obtained from PROMs: Protocol for an**  
5 **observational study.**  
6  
7

8  
9 Kevin Moody\*<sup>1, 2</sup>, Pythia T Nieuwkerk<sup>2, 3</sup>, Maarten Bedert<sup>1, 2</sup>, Jeannine Nellen<sup>1</sup>,  
10 Annouschka Weijsenfeld<sup>1</sup>, Kim Sigaloff<sup>4</sup>, Laura Laan<sup>4</sup>, Claire Bruins<sup>1</sup>, Hedy van  
11 Oers<sup>2, 5</sup>, Lotte Haverman<sup>2, 5</sup>, Suzanne E Geerlings<sup>1, 2</sup>, Marc van der Valk<sup>1, 6</sup>  
12  
13  
14

- 15  
16 1. Amsterdam UMC, University of Amsterdam, Department of Internal Medicine,  
17 Division of Infectious Diseases, Amsterdam Institute for Infection and  
18 Immunology, Amsterdam, North Holland, Netherlands  
19  
20 2. Amsterdam Public Health Research Institute, Amsterdam, North Holland,  
21 Netherlands  
22  
23 3. Amsterdam UMC, University of Amsterdam, Department of Medical Psychology,  
24 Amsterdam Institute for Infection and Immunology. Amsterdam, North Holland,  
25 Netherlands  
26  
27 4. Amsterdam UMC, Vrije Universiteit, Department of Internal Medicine, Division of  
28 Infectious Diseases, Amsterdam Institute for Infection and Immunology  
29 Amsterdam, Netherlands  
30  
31 5. Amsterdam UMC, University of Amsterdam, Child and Adolescent Psychiatry &  
32 Psychological Care, Emma Children's Hospital, Amsterdam Reproduction and  
33 Development, Amsterdam, Netherlands  
34  
35 6. HIV Monitoring Foundation, Amsterdam, Netherlands  
36  
37  
38  
39  
40  
41  
42  
43

44 \*Corresponding author: Kevin Moody, Amsterdam UMC, University of Amsterdam,  
45 Meibergdreef 9, 1105 AZ Amsterdam, Netherlands. Tel: +3120 5664380. No fax  
46 number. Email: k.moody@amsterdamumc.nl  
47  
48  
49

50  
51 **Keywords:** Quality of Life, Patient Reported Outcome Measures, HIV & AIDS  
52 (Infectious diseases), Quality in health care (Health services administration and  
53 management), Patient-Centered Care  
54  
55

56  
57  
58 **Word count:** 1904  
59  
60

1  
2  
3  
4 **Optimising HIV care using information obtained from PROMs: Protocol for an**  
5 **observational study.**  
6  
7

8  
9 **ABSTRACT** (word count 300, excluding headings)  
10

11  
12 **Introduction** Successful antiviral therapy has transformed human immunodeficiency  
13 virus infection into a chronic condition, where optimizing quality of life (QoL) has  
14 become essential for successful lifelong treatment. Patient-reported outcome  
15 measures (PROMs) can signal potential physical and mental health problems related  
16 to QoL. This study aims to determine whether PROMs in routine clinical care  
17 improve quality of care as experienced by people with HIV (PWH).  
18  
19

20  
21 **Methods and analysis** We report the protocol of a multicentre longitudinal cohort  
22 studying PWH at Amsterdam University Medical Centers in the Netherlands. PROMs  
23 are offered annually to patients via the patient portal of the electronic health record.  
24 Domains include anxiety, depression, fatigue, sleep disturbances, social isolation,  
25 physical functioning, stigma, post-traumatic stress disorder, adherence, drug and  
26 alcohol use, and screening questions for sexual health and issues related to  
27 finances, housing, and migration status. Our intervention comprises: (1) patients'  
28 completion of PROMs, (2) discussion of PROMs scores during annual consultations,  
29 and (3) documentation of follow-up actions in an individualised care plan, if indicated.  
30 The primary endpoint will be patient-experienced quality of care, measured by the  
31 Patient Assessment of Chronic Illness Care, Short Form (PACIC-S). Patients will  
32 provide measurements at baseline, Year 1, and Year 2. We will explore change over  
33 time in PACIC-S and PROMs scores and examine the socio-demographic and HIV-  
34 specific characteristics of subgroups of patients who participated in all or only part of  
35 the intervention to ascertain whether benefit has been achieved from our intervention  
36 in all subgroups.  
37  
38

39  
40  
41 **ETHICS AND DISSEMINATION**  
42

43 Patients provide consent for the analysis of data collected as part of routine clinical  
44 care to the ATHENA cohort through mechanisms described in Boender et al (2018).  
45 Additional ethical approval for the analysis of these data is not required under the  
46 ATHENA cohort protocol. The results will be presented at national and international  
47 academic meetings and submitted to peer-reviewed journals for publication.  
48  
49  
50  
51  
52  
53  
54  
55  
56  
57  
58  
59  
60

## Keywords

Quality of Life, HIV & AIDS (Infectious diseases), Patient Reported Outcome Measures, Patient centred care

## Article Summary

- This study's strengths include its multi-site, longitudinal design.
- Accessing linkages to socio-demographic and HIV-specific data facilitates making inferences about obtained benefit based on patient characteristics.
- Our study connects discussing PROMs between patients and healthcare providers in routine clinical care with improvement of patient experience of quality of care.
- The absence of a control group is a limitation of this study.
- Patients with limited literacy, limited digital literacy and limited access to digital health solutions are potentially the people who might benefit most, but they cannot participate in this study.

**ARTICLE** (word count 1924)**INTRODUCTION**

In the last 40 years the life expectancy of people living with HIV (PWH) has increased immensely due to the availability of safe and effective antiretroviral treatment transforming the condition into a chronic condition. PWH who enter care without severe HIV-associated complications have a similar life expectancy to those without HIV but lack behind in quality of life. [1] PWH are at greater risk of experiencing multiple chronic comorbidities as they age [2], including cardiovascular diseases, cancers, and psychological conditions, such as depression [3]. They might also experience stigma and discrimination due to multiple stigmatised identities, including their HIV disease and characteristics that make them vulnerable to HIV, such as their sexuality or migration status. [4] Together, increased risk of multiple chronic comorbidities and stigma and discrimination can combine to negatively affect the quality of life (QoL) of PWH. [5-7]

Patient-reported outcome measures (PROMs) are validated instruments that measure QoL among specific domains, including physical and mental health functioning, stigma, medication adherence, social status, housing, finances, and sexuality. [8,9] Discussion of PROMs scores between patients and healthcare providers (HCP) as part of routine clinical care for diseases, such as diabetes, arthritis, asthma, cancer, and HIV facilitate shared decision making [9,10]; improve communications between patients and HCP [9-15]; help to signal potential health problems [15,16], including psychosocial issues [11,17,18]; and increase patient satisfaction with care [19].

For routine clinical care in HIV outpatient clinics, earlier studies have shown that PROMs can help identify previously unnoticed physical and mental health problems [16,20] identify problematic substance use [21], improve adherence [15,20], and encourage patient-HCP communication and the development of care plans [22]. In our study, we introduce the PWH perspective by exploring whether engagement in PROMs affects patient-experienced quality of care, which can be linked to patient-

1  
2  
3  
4 centredness, and system-related Chronic Care Model domains as measured by the  
5 PACIC-S [23,24].  
6  
7

### 8 9 **Study aims and hypothesis**

10 The primary objective of our study is to determine whether the quality of routine  
11 clinical HIV care as perceived by PWH improves with the introduction of PROMs,  
12 which involves patients completing PROMs questionnaires, HCP discussing PROMs  
13 scores during annual consultations, and documenting follow up actions in individual  
14 care plans, if indicated.  
15  
16  
17  
18

19  
20  
21 We hypothesise that the experience of quality of care among PWH will improve by  
22 introducing PROMS to routine HIV care through the early signalling of physical and  
23 psychosocial health problems, followed up with subsequent actions, if indicated.  
24  
25  
26  
27

## 28 **METHODS AND ANALYSIS**

### 29 **Setting**

30  
31 This is a multicentre intervention studying PWH in care at two of the HIV treatment  
32 centres in Amsterdam the Netherlands that are affiliated with Amsterdam University  
33 Medical Centers (AMC site and VUMC site), together taking care of 2853 individuals.  
34 We will limit the analyses to individuals who are part of the ongoing ATHENA cohort  
35 in which 98% of individuals in care have provided consent. Pseudonymized data  
36 transfer and analysis mechanisms for these individuals are managed by Stichting  
37 HIV Monitoring on behalf of ATHENA cohort patients through agreements with all  
38 treatment centres in the Netherlands, including the two involved in this study. [25]  
39 Appendix 1 in the supplement provides patient and HCP details per site.  
40  
41  
42  
43  
44  
45  
46  
47  
48

### 49 **Study procedures**

50 PROMs will be sent to people in care once yearly as an integral component of  
51 routine care one to two weeks prior to their consultation and can be completed in  
52 their electronic patient portal. PROMs scores will be discussed with HCP during the  
53 annual control consultation. Physicians and nurses in participating centres work  
54 together in fixed pairs, which we consider clusters for this study.  
55  
56  
57  
58  
59  
60

## Eligibility

Patients 18 years old and above who can engage with healthcare providers in either English and Dutch and who are registered with the electronic patient portal at Amsterdam UMC will be offered the PROMs to complete before their annual consultations.

## Recruitment

We will approach consecutive patients in two groups. Group 1 will comprise individuals whose annual control consultations take place in the first six months after the rollout of PROMs in the clinics. Rollout will take place sequentially per site. Group 2 will comprise individuals who were approached but who did not complete PROMs in Year 1. Group 2 will be offered PROMs once again in Year 2 and followed as a separate group.

## PROMs selected for routine clinical care

We consulted internal and external stakeholders in late 2020 to determine which domains were most relevant to address the QoL of PWH. Internally, the core team comprising key HIV nurses, infectious disease physicians, a psychiatrist, a social worker, and a medical psychologist first assessed the needs of their patient populations and translated these into QoL domains for which PROMs could be implemented. Externally, these were reviewed and adapted by representatives from community organisations, including the national association of PWH (*Hiv vereniging*), an organisation that works with people who use drugs (Mainline), and by a lawyer specialised in migration law. Members of the PROMs Expertise Centre of Amsterdam UMC provided technical support on the PROMs that would address those domains and will provide training to HCP.

PROMs domains include anxiety, depression, fatigue, sleep disturbances, social isolation, physical functioning, stigma, post-traumatic stress disorder, adherence, drug and alcohol use, and screening questions for sexual health and issues related to finances, housing and migration status. Appendix 2 in the supplement provides the full list of PROMs selected, their characteristics, and their sources. Where possible, we selected Patient-Reported Outcomes Measurement Information System



1  
2  
3  
4 (PROMIS) Computer Adaptive Tests (CATs) for which the selection of items is  
5 tailored to the individual based on responses to prior items. [26] This minimizes the  
6 burden on the patient while providing maximally useful information and accuracy.  
7 [27] Appendix 3 provides technical details of which PROMIS instruments were used  
8 and Appendices 4 to 8 provide details about the questionnaires that we created or  
9 adapted.  
10  
11  
12  
13  
14

### 15 16 **Individualised care plan**

17 Individual care plans will be completed by the HCP after the PROMs scores have  
18 been discussed at the outpatient clinic. The individual care plans will indicate  
19 whether the PROMs have been discussed and describe types of information  
20 provided and/or referrals made to other departments within the hospital, medical or  
21 allied medical services outside the hospital, or community/peer support. Follow up  
22 will take place at the next six-monthly consultation unless otherwise agreed upon in  
23 the consultation.  
24  
25  
26  
27  
28  
29  
30

31 Documentation of the individualised care plan will take place via an electronic form  
32 integrated in the electronic health record at AMC and VUMC that leads the HCP  
33 through a set of questions related to their clinical findings. Figure 1 shows the logic  
34 flow that the template takes to guide the HCP in documenting the individualised care  
35 plan. The HCP can document actions for up to three different PROMs, labelled in  
36 Figure 1 as PROM A, PROM B, and PROM C, that represent quality of life  
37 categories triggered by PROMs scores.  
38  
39  
40  
41  
42  
43  
44

45 Figure 1: Individualised care plan flowchart  
46  
47  
48

### 49 **Endpoints**

50 The primary endpoint will be patient-experienced quality of care as measured by the  
51 Patient Assessment of Chronic Illness Care, Short Form (PACIC-S), which measures  
52 patients' experiences with how closely services follow the Chronic Care Model.  
53 [23,24] PACIC-S scores indicating a higher experienced quality of care have been  
54 shown to be correlated with PROMs scores indicating a better quality of life. [24, 28,  
55 29] This questionnaire is delivered to patients as part of the basic package of  
56  
57  
58  
59  
60

PROMs (see Appendix 2 in the supplement). All other PROMs are secondary outcome measures.

### Sample size

To be able to detect a change in our primary outcome, the PACIC-S total score, with an effect size of 0.2 (Cohen's  $d$ , small sized effect) [30] from baseline to the follow-up measurements with 80% power and a two-sided  $p$ -value of 0.05, a total of 199 patients would be required.

To account for the clustered nature of the data (patients are nested within fixed pairs of HCPs), we will multiply this sample size by a correction factor of  $1 + (m - 1) \rho$ , where  $m$  is the mean expected cluster size and  $\rho$  is the anticipated intraclass correlation coefficient. [31] We assume an intraclass correlation of  $\rho=0.017$  [31]. Assuming we will recruit  $m$  of 13 patients per cluster, the correction factor is 1.204 for the cluster design. To account for the clustered design, the study would require a total of 240 patients, which we will obtain by approaching consecutive patients until we reach or surpass this number.

### Data collection and assessment

Figure 2: Study timeline and data collection points

Figure 2 provides the schema for data collection. Group 1 will provide three measurement moments: G1 baseline, G1 Year 1, and G1 Year 2. Group 2 will provide two measurement moments: G2 baseline and G2 Year 1.

### Analysis and statistical considerations

#### Descriptive statistics

Descriptive data will include PROMs scores, demographics – age, sex, gender, location of treatment centre, country/region of origin – and HIV-specific characteristics – year of diagnosis, viral load suppressed or not, CD4 count.

## Statistical analysis

We will compare demographic and HIV-specific characteristics among patients who complete the PROMs, those who received the PROMs and do not complete them, and those who were not offered PROMs because they do not have access to the electronic patient portals. We will determine whether our sample is representative of the total patient population using chi-squared tests and Student t-tests, analysis of variance (ANOVA) or their non-parametric counterparts were appropriate.

We will analyse changes in the PACIC-S and PROMs scores over time using mixed linear models. The PACIC-S and the PROMs are the dependent variables. Time will be included as a categorical fixed factor (baseline, Year 1, Year 2). Repeated measurements will be nested within participants to account for the clustering of data within participants. We will include a random intercept on the HCP pairs level to account for the clustering of data within HCP pairs.

We will investigate change over time in PACIC-S and PROMS scores among all patients who were offered the intervention (intention-to-treat population). Additionally, we will explore change over time in PACIC-S and PROMS scores among subgroups of patients 1) with whom PROMS scores were discussed without further follow-up actions, 2) with whom PROMS scores were discussed with subsequent documentation of follow-up activities within individualised care plans, and 3) those who completed the PROMs but where the scores were not discussed with the HCP.

To identify socio-demographic/ HIV-specific characteristics significantly associated with obtaining more or less benefit from PROMs we will conduct series of mixed linear models in which socio-demographic/ HIV-specific characteristics will be added one by one as fixed factors to the model that also includes time as fixed factor. The PACIC-S and other PROMS scores will be the dependent variable. Socio-demographic/ HIV-specific characteristics with a Wald  $\chi^2$  test p-value <0.20 will be included in further multivariate modelling. Subsequently, socio-demographic/ HIV-

1  
2  
3  
4 specific characteristics with p-values  $>0.05$  will be removed from the multivariate  
5 model using backward elimination.  
6  
7

8  
9 Two-sided p-values  $<0.05$  are considered to indicate statistical significance. Data  
10 analysis will be conducted using SPSS version 26 and/or Stata version 16.  
11  
12

### 13 14 **Patient and public involvement**

15 The PROMs for routine clinical care were selected with input from the Dutch national  
16 HIV patient association. Patients will be involved in piloting the clinical protocol and  
17 in the co-creation of tools to support PROMs health literacy, which should lead to  
18 increased patient satisfaction. [32]  
19  
20  
21  
22

### 23 24 **ETHICS AND DISSEMINATION**

25 Patients provide consent for the analysis of data collected as part of routine clinical  
26 care to the ATHENA cohort through mechanisms described in Boender et al (2018).  
27 [25] Additional ethical approval for the analysis of these data is not required under  
28 the ATHENA cohort protocol. The results will be presented at national and  
29 international academic meetings and submitted to peer-reviewed journals for  
30 publication.  
31  
32  
33  
34  
35  
36  
37

### 38 39 **Authors Contributions**

40 KM, PTN, MB, JN, AW, KS, SEG and MvdV contributed to the conception of the  
41 study. MvdV is the study chief investigator. PTN performed the power analysis. KM  
42 and PTN prepared the first draft of the manuscript for publication. KM is responsible  
43 for the study management, with oversight by MvdV, SEG, PTN and MB. KM, PTN,  
44 MB, JN, AW, KS, LL, CB, HvO, LH, SEG and MvdV contributed to revising the  
45 manuscript and approved the final version to be published.  
46  
47  
48  
49  
50  
51

### 52 53 **Competing Interest**

54 KM has received fees for educational activities from Springer Media and Gilead  
55 Sciences. FJBN has received fees for educational activities from Virology Education,  
56 Gilead, ViiV Healthcare, MSD and Astra Zeneca and fees for participation in  
57 scientific advisory boards from Gilead Sciences, ViiV Healthcare, MSD and Astra  
58  
59  
60

Zeneca all paid to her institution. MvdV has received unrestricted research funding from ViiV, Gilead and fees for participation in scientific advisory boards from ViiV, Gilead Sciences and MSD all paid to his institution.

### Funding statement

This work has been supported in part by unrestricted grants from Gilead Sciences and ViiV Healthcare.

### References

1. van Sighem AI, Gras L, Reiss P, Brinkman K, de Wolf F, on behalf of the ATHENA national observational cohort study. Life expectancy of recently diagnosed asymptomatic HIV-infected patients approaches that of uninfected individuals. *AIDS* 2010;24(10):1527-1535. doi:10.1097/QAD.0b013e32833a3946.
2. van Sighem AI, Wit FWNM, Boyd A, Smit C, Matser A, van der Valk M. Monitoring Report 2021. Human Immunodeficiency Virus (HIV) Infection in the Netherlands. Stichting HIV Monitoring, 2021. [https://www.hiv-monitoring.nl/application/files/1816/6851/5357/NL\\_HIV\\_MONITORING\\_REPORT\\_2022.pdf](https://www.hiv-monitoring.nl/application/files/1816/6851/5357/NL_HIV_MONITORING_REPORT_2022.pdf). Accessed 20 Feb 2023.
3. Nanni MG, Caruso R, Mitchell AJ, Meggiolaro E, Grassi L. Depression in HIV infected patients: a review. *Curr Psychiatry Rep*. 2015;17(1):530. doi:10.1007/s11920-014-0530-4.
4. Nyblade L, Mingkwan P, Stockton MA. Stigma reduction: an essential ingredient to ending AIDS by 2030. *Lancet HIV*. 2021;8(2):e106-e113. doi:10.1016/S2352-3018(20)30309-X.
5. Turan JM, Elafros MA, Logie CH, Banik S, Turan B, Crockett KB, et al. Challenges and opportunities in examining and addressing intersectional stigma and health. *BMC Med*. 2019;17(1):7. doi:10.1186/s12916-018-1246-9.
6. Logie CH, Wang Y, Lacombe-Duncan A, Wagner AC, Kaida A, Conway T, Webster K, de Pokomandy A, Loutfy MR. HIV-related stigma, racial discrimination, and gender discrimination: Pathways to physical and mental health-related quality of

1  
2  
3  
4 life among a national cohort of women living with HIV. *Prev Med.* 2018;107:36-44.  
5 doi:10.1016/j.ypmed.2017.12.018.

6  
7 7. Engelhard EAN, Smit C, van Dijk PR, Kuijper TM, Wermeling PR, Weel AE, de  
8 Boer MR, Brinkman K, Geerlings SE, Nieuwkerk PT. Health-related quality of life of  
9 people with HIV: an assessment of patient related factors and comparison with other  
10 chronic diseases. *AIDS.* 2018;32(1):103-112. doi:10.1097/QAD.0000000000001672.

11  
12 8. Kall M, Marcellin F, Harding R, Lazarus JV, Carrieri P. Patient-reported outcomes  
13 to enhance person-centred HIV care. *Lancet HIV.* 2020;7(1):e59-e68.  
14 doi:10.1016/S2352-3018(19)30345-5.

15  
16 9. Lavalley DC, Chenok KE, Love RM, Petersen C, Holve E, Segal CD, et al.  
17 Incorporating Patient-Reported Outcomes Into Health Care To Engage Patients And  
18 Enhance Care. *Health Aff (Millwood).* 2016;35(4):575-582. doi:  
19 10.1377/hlthaff.2015.1362.

20  
21 10. Bouazza YB, Chiari I, El Kharbouchi O, De Backer L, Vanhoutte G, Janssens A,  
22 Van Meerbeeck JP. Patient-reported outcome measures (PROMs) in the  
23 management of lung cancer: A systematic review. *Lung Cancer.* 2017;113:140-151.  
24 doi:10.1016/j.lungcan.2017.09.011.

25  
26 11. Greenhalgh J, Gooding K, Gibbons E, Dalkin S, Wright J, Valderas J, Black N.  
27 How do patient reported outcome measures (PROMs) support clinician-patient  
28 communication and patient care? A realist synthesis. *J Patient Rep Outcomes.*  
29 2018;2:42. doi:10.1186/s41687-018-0061-6.

30  
31 12. Detmar SB, Muller MJ, Schornagel JH, Wever LD, Aaronson NK. Health-related  
32 quality-of-life assessments and patient-physician communication: a randomized  
33 controlled trial. *JAMA.* 2002;288(23):3027-3034. doi:10.1001/jama.288.23.3027.

34  
35 13. Velikova G, Booth L, Smith AB, et al. Measuring quality of life in routine oncology  
36 practice improves communication and patient well-being: a randomized controlled  
37 trial. *J Clin Oncol.* 2004;22(4):714-724. doi:10.1200/JCO.2004.06.078.

38  
39 14. Gibbons C, Porter I, Gonçalves-Bradley DC, Stoilov S, Ricci-Cabello I, Tsangaris  
40 E, et al. Routine provision of feedback from patient-reported outcome measurements  
41 to healthcare providers and patients in clinical practice. *Cochrane Database Syst  
42 Rev.* 2021;10(10):CD011589. doi:10.1002/14651858.CD011589.pub2.

43  
44 15. Short D, Fredericksen RJ, Crane HM, Fitzsimmons E, Suri S, Bacon J, et al.  
45 Utility and Impact of the Implementation of Same-Day, Self-administered Electronic  
46  
47  
48  
49  
50  
51  
52  
53  
54  
55  
56  
57  
58  
59  
60

- 1  
2  
3  
4 Patient-Reported Outcomes Assessments in Routine HIV Care in two North  
5 American Clinics. *AIDS Behav.* 2022;26(7):2409-2424. doi:10.1007/s10461-022-  
6 03585-w.  
7  
8  
9 16. Kjær ASHK, Rasmussen TA, Hjollund NH, Rodkjaer LO, Storgaard M. Patient-  
10 reported outcomes in daily clinical practice in HIV outpatient care. *Int J Infect Dis.*  
11 2018;69:108-114. doi:10.1016/j.ijid.2018.02.015.  
12  
13 17. Jabour SM, Chander G, Riekert KA, Keruly JC, Herne K, Hutton H, Beach MC,  
14 Lau B, Moore RD, Monroe AK. The Patient Reported Outcomes as a Clinical Tool  
15 (PROACT) Pilot Study: What Can be Gained by Sharing Computerized Patient-  
16 Reported Mental Health and Substance Use Symptoms with Providers in HIV Care?  
17 *AIDS Behav.* 2021 Sep;25(9):2963-2972. doi: 10.1007/s10461-021-03175-2.  
18  
19 18. Valderas JM, Kotzeva A, Espallargues M, Guyatt G, Ferrans CE, Halyard MY, et  
20 al. The impact of measuring patient-reported outcomes in clinical practice: a  
21 systematic review of the literature. *Qual Life Res.* 2008;17(2):179-193.  
22 doi:10.1007/s11136-007-9295-0.  
23  
24 19. Kotronoulas G, Kearney N, Maguire R, Harrow A, Di Domenico C, Croy S, et al.  
25 What is the value of the routine use of patient-reported outcome measures toward  
26 improvement of patient outcomes, processes of care, and health service outcomes in  
27 cancer care? A systematic review of controlled trials. *J Clin Oncol.*  
28 2014;32(14):1480-1501. doi:10.1200/JCO.2013.53.5948.  
29  
30 20. Crane HM, Lober W, Webster E, Harrington RD, Crane PK, Davis TE, Kitahata  
31 MM. Routine collection of patient-reported outcomes in an HIV clinic setting: the first  
32 100 patients. *Curr HIV Res.* 2007;5(1):109-118. doi:10.2174/157016207779316369.  
33  
34 21. Crane HM, Crane PK, Tufano JT, Ralston JD, Wilson IB, Brown TD, et al. HIV  
35 Provider Documentation and Actions Following Patient Reports of At-risk Behaviors  
36 and Conditions When Identified by a Web-Based Point-of-Care Assessment *AIDS*  
37 *Behav.* 2017;21(11):3111-3121. doi:10.1007/s10461-017-1718-5.  
38  
39 22. Jabour SM, Chander G, Riekert KA, Keruly JC, Herne K, Hutton H, Beach MC,  
40 Lau B, Moore RD, Monroe AK. The Patient Reported Outcomes as a Clinical Tool  
41 (PROACT) Pilot Study: What Can be Gained by Sharing Computerized Patient-  
42 Reported Mental Health and Substance Use Symptoms with Providers in HIV Care?  
43 *AIDS Behav.* 2021 Sep;25(9):2963-2972. doi: 10.1007/s10461-021-03175-2.  
44  
45  
46  
47  
48  
49  
50  
51  
52  
53  
54  
55  
56  
57  
58  
59  
60

- 1  
2  
3  
4 23. Cramm JM, Nieboer AP. Factorial validation of the Patient Assessment of  
5 Chronic Illness Care (PACIC) and PACIC short version (PACIC-S) among  
6 cardiovascular disease patients in the Netherlands. *Health Qual Life Outcomes*.  
7 2012;10:104. doi:10.1186/1477-7525-10-104.  
8  
9  
10 24. Schmittdiel J, Mosen DM, Glasgow RE, Hibbard J, Remmers C, Bellows J.  
11 Patient Assessment of Chronic Illness Care (PACIC) and improved patient-centered  
12 outcomes for chronic conditions. *J Gen Intern Med*. 2008;23(1):77-80.  
13 doi:10.1007/s11606-007-0452-5.  
14  
15  
16 25. Boender TS, Smit C, Sighem A, Bezemer D, Ester CJ, Zaheri S, et al. AIDS  
17 Therapy Evaluation in the Netherlands (ATHENA) national observational HIV cohort:  
18 cohort profile. *BMJ Open*. 2018;8(9):e022516. doi:10.1136/bmjopen-2018-022516.  
19  
20  
21 26. Cella D, Gershon R, Lai JS, Choi S. The future of outcomes measurement: item  
22 banking, tailored short-forms, and computerized adaptive assessment. *Qual Life*  
23 *Res*. 2007;16 Suppl 1:133-41. doi:10.1007/s11136-007-9204-6.  
24  
25  
26 27. Segawa E, Schalet B, Cella D. A comparison of computer adaptive tests (CATs)  
27 and short forms in terms of accuracy and number of items administered using  
28 PROMIS profile. *Qual Life Res*. 2020;29(1):213-221. doi:10.1007/s11136-019-  
29 02312-8.  
30  
31  
32 28. Desmedt M, Vertriest S, Petrovic M, Bergs J, Vrijhoef H, Dessers E, et al. Seen  
33 through the patients' eyes: quality of chronic illness care. *Fam Pract*.  
34 2018;35(4):446-451. doi:10.1093/fampra/cmz123.  
35  
36  
37 29. Randell RL, Long MD, Martin CF, Sandler RS, Chen W, Anton K, et al. Patient  
38 perception of chronic illness care in a large inflammatory bowel disease cohort.  
39 *Inflamm Bowel Dis*. 2013;19(7):1428-1433. doi:10.1097/MIB.0b013e3182813434.  
40  
41  
42 30. Cohen J. *Statistical power analysis for the behavioural sciences*. Mahwah, NJ:  
43 Erlbaum; 1988.  
44  
45  
46 31. Killip S, Mahfoud Z, Pearce K. What Is an Intraclass Correlation Coefficient?  
47 Crucial Concepts for Primary Care Researchers. *Ann Fam Med*. 2004;2(3):204-  
48 208. doi: 10.1370/afm.141.  
49  
50  
51 32. Lim S, Morris H, Pizzirani B, Kajewski D, Lee WK, Skouteris H. Evaluating  
52 hospital tools and services that were co-produced with patients: A rapid review. *Int J*  
53 *Qual Health Care*. 2020;32(4):231-239. doi:10.1093/intqhc/mzaa020.  
54  
55  
56  
57  
58  
59  
60



1  
2  
3  
4  
5  
6  
7  
8  
9  
10  
11  
12  
13  
14  
15  
16  
17  
18  
19  
20  
21  
22  
23  
24  
25  
26  
27  
28  
29  
30  
31  
32  
33  
34  
35  
36  
37  
38  
39  
40  
41  
42  
43  
44  
45  
46  
47  
48  
49  
50  
51  
52  
53  
54  
55  
56  
57  
58  
59  
60

For peer review only

1  
2  
3  
4  
5  
6  
7  
8  
9  
10  
11  
12  
13  
14  
15  
16  
17  
18  
19  
20  
21  
22  
23  
24  
25  
26  
27  
28  
29  
30  
31  
32  
33  
34  
35  
36  
37  
38  
39  
40  
41  
42  
43  
44  
45  
46  
47  
48  
49  
50  
51  
52  
53  
54  
55  
56  
57  
58  
59  
60



Figure 1: Individualised Care Plan Flowchart

305x178mm (120 x 120 DPI)

1  
2  
3  
4  
5  
6  
7  
8  
9  
10  
11  
12  
13  
14  
15  
16  
17  
18  
19  
20  
21  
22  
23  
24  
25  
26  
27  
28  
29  
30  
31  
32  
33  
34  
35  
36  
37  
38  
39  
40  
41  
42  
43  
44  
45  
46  
47  
48  
49  
50  
51  
52  
53  
54  
55  
56  
57  
58  
59  
60

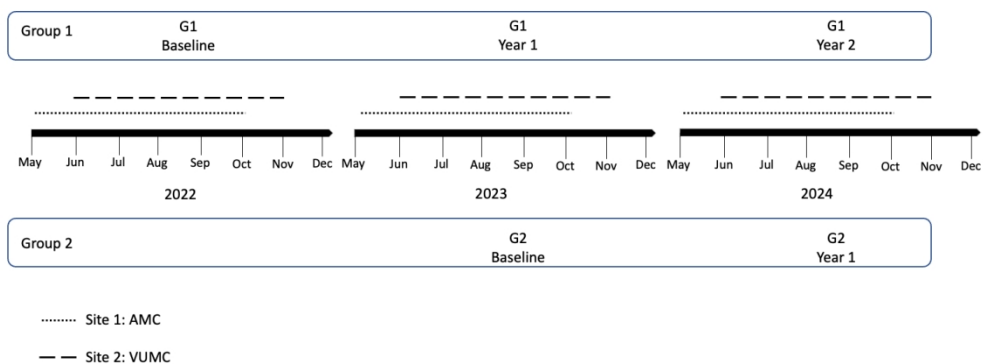

Figure 2: Study timeline and data collection points protocol enrolment

266x101mm (150 x 150 DPI)

1  
2  
3 **Optimising HIV care using information obtained from PROMs: Protocol for an**  
4 **observational study.**  
5

6  
7 **Supplement**  
8

9 **Appendix 1: Numbers of patients, doctors, and nurses per site**  
10

11

| Site | Patients | Doctors                | Nurses |
|------|----------|------------------------|--------|
| AMC  | 2255     | 13 plus 1 to 3 fellows | 6      |
| VUMC | 598      | 4 plus 2 fellows       | 3      |

12  
13  
14  
15  
16  
17  
18  
19  
20  
21  
22  
23  
24  
25  
26  
27  
28  
29  
30  
31  
32  
33  
34  
35  
36  
37  
38  
39  
40  
41  
42  
43  
44  
45  
46  
47  
48  
49  
50  
51  
52  
53  
54  
55  
56  
57  
58  
59  
60

## Appendix 2: PROMs used in the outpatient clinics

Six PROMIS CAT domains were chosen for anxiety, depression, fatigue, physical functioning, sleep disturbances and social isolation. In the DC Klinieken site, we used the PROMIS social isolation 8-item short because the CAT version was not available for its electronic patient portal.

The five-item Medication Adherence Report Scale (MARS) was selected to assess adherence. We chose two subscales of the short Berger HIV Stigma to assess disclosure concerns and negative self-image, along with two screening questions added by community partners the Dutch HIV Association and Shiva: “HIV is a punishment” and “HIV can happen to anybody”. We introduced a screening process for the Alcohol Use Disorders Identification Test (AUDIT) to allow patients who never drink alcohol and those who drink less than 7 units per week? when they do drink to skip the rest of the instrument. We adapted the Drug Use Disorders Identification Test (DUDIT) with input from Mainline, the Dutch harm reduction organisation, to be less confrontational for our patients and further adapted it to reflect the types of drugs that our patients are most likely to use. We chose the Primary Care PTSD Screen for DSM-5 (PC-PTSD-5) to screen for post-traumatic stress disorder. Internal and external stakeholders developed extra questions for our clinics’ populations to screen for social status, including finances, housing and immigration status, and sexuality.

## Appendix 2 - Table: PROMs used in the outpatient clinics

| PROM                                                                        | Domain(s)                                                                                                                     | Number of Items                                                                                                      | Scales                                                                                             | Frequency                                                                                    |
|-----------------------------------------------------------------------------|-------------------------------------------------------------------------------------------------------------------------------|----------------------------------------------------------------------------------------------------------------------|----------------------------------------------------------------------------------------------------|----------------------------------------------------------------------------------------------|
| PROMIS Adult                                                                | Anxiety(v1.0), depression(v1.0) , fatigue(v1.0), physical functioning(v1.2), sleep disturbances(v1.1), social isolation(v1.0) | See Appendix 3 Table: PROMIS Adult versions used in the outpatient clinics for details                               | T-score 10-90; higher is worse, except for physical functioning where higher is better             | Once yearly                                                                                  |
| Medication Adherence Report Scale-5 (MARS-5) <sup>ii</sup>                  | Treatment adherence                                                                                                           | 5                                                                                                                    | Total score 5-25; higher is better                                                                 | On demand for treatment switches, temporary increases in viral load (blips), and pregnancies |
| Berger HIV Stigma Scale (12-item) <sup>iii</sup> adapted                    | HIV Stigma                                                                                                                    | 8                                                                                                                    | Subscale 1, Disclosure: 3-12<br>Subscale 2, Self-stigma: 3-12<br>Subscale 3: n/a<br>No total score | Every three years                                                                            |
| Adapted AUDIT <sup>iv</sup>                                                 | Problematic alcohol use                                                                                                       | 1 screening question<br>1 question with to determine problematic alcohol use<br>10 questions from AUDIT              | Total score 0-40, higher is worse.                                                                 | Once yearly                                                                                  |
| Drug use (adapted from DUDIT) <sup>v</sup>                                  | Drug use                                                                                                                      | 1 screening question<br>1 question with list of drugs patient has had experience with<br>10 questions based on DUDIT | Score 0-6 per question, higher is worse. No total score                                            | Once yearly                                                                                  |
| Social status <sup>vi</sup>                                                 | Finances, housing, migration status                                                                                           | 1                                                                                                                    | N/A                                                                                                | Once yearly                                                                                  |
| Sexuality screening <sup>vii</sup>                                          | Sexuality                                                                                                                     | 4                                                                                                                    | N/A                                                                                                | Once yearly                                                                                  |
| PC-PTSD-5 <sup>viii</sup>                                                   | Post-traumatic stress disorder                                                                                                | 1 screening question, followed by 5 if screening is positive                                                         | Total score 0-5, higher is worse, 3 is an indication of PTSD                                       | Every three years                                                                            |
| Patient Assessment Chronic Illness Care, Short Form (PACIC-S) <sup>ix</sup> | Patient perception of quality of care and patient engagement                                                                  | 11                                                                                                                   | Total score 11-55                                                                                  | Once yearly                                                                                  |

i Hanmer, J., Jensen, R.E. & Rothrock, N. A reporting checklist for HealthMeasures' patient-reported outcomes: ASCQ-Me, Neuro-QoL, NIH Toolbox, and PROMIS. *J Patient Rep Outcomes* 4, 21 (2020). <https://doi.org/10.1186/s41687-020-0176-4>

ii Chan AHY, Horne R, Hankins M, Chisari C. The Medication Adherence Report Scale: A measurement tool for eliciting patients' reports of nonadherence. *Br J Clin Pharmacol.* 2020;86(7):1281-1288. doi:10.1111/bcp.14193.

iii Reinius, M., Wettergren, L., Wiklander, M. et al. Development of a 12-item short version of the HIV stigma scale. *Health Qual Life Outcomes.* 2027;15:115). doi:10.1186/s12955-017-0691-z

iv Saunders JB, Aasland OG, Babor TF, de la Fuente JR, Grant M. Development of the Alcohol Use Disorders Identification Test (AUDIT): WHO Collaborative Project on Early Detection of Persons with Harmful Alcohol Consumption--II. *Addiction.* 1993;88(6):791-804. doi:10.1111/j.1360-0443.1993.tb02093.x. See appendix 4 for our adaptations.

v Dudit available: <https://www.emcdda.europa.eu/system/files/attachments/12173/DUDIT-English-version.pdf>. Accessed 20 Feb 2023. See appendix 5 for our adaptations.

vi Screening question developed by the PROMs Kerngroep, along with a full questionnaire that healthcare workers complete if the screening is positive. See Appendix 6.

vii Questions developed by the PROMs Kerngroep and Champions. See appendix 6.

viii Prins A, Bovin MJ, Smolenski DJ, Marx BP, Kimerling R, Jenkins-Guarnieri MA, Kaloupek DG, Schnurr PP, Kaiser AP, Leyva YE, Tiet QQ. The Primary Care PTSD Screen for DSM-5 (PC-PTSD-5): Development and Evaluation Within a Veteran Primary Care Sample. *J Gen Intern Med.* 2016 Oct;31(10):1206-11. doi: 10.1007/s11606-016-3703-5.

ix Cramm JM, Nieboer AP. Factorial validation of the Patient Assessment of Chronic Illness Care (PACIC) and PACIC short version (PACIC-S) among cardiovascular disease patients in the Netherlands. *Health Qual Life Outcomes.* 2012;10:104. Published 2012 Aug 31. doi:10.1186/1477-7525-10-104

## Appendix 3

Table: PROMIS Adult versions used in the outpatient clinics

| Location | Type                     | Domain                              | Version |
|----------|--------------------------|-------------------------------------|---------|
| AMC/VUMC | English and Dutch<br>CAT | Anxiety <sup>i</sup>                | 1.0     |
|          |                          | Depression <sup>i</sup>             | 1.0     |
|          |                          | Fatigue <sup>ii</sup>               | 1.0     |
|          |                          | Physical functioning <sup>iii</sup> | 1.2     |
|          |                          | Sleep disturbances <sup>iv</sup>    | 1.0     |
|          |                          | Social isolation <sup>v</sup>       | 2.0     |

i. Pilkonis PA, Choi SW, Reise SP, Stover AM, Riley WT, Cella D, et al. Item banks for measuring emotional distress from the Patient-Reported Outcomes Measurement Information System (PROMIS®): depression, anxiety, and anger. *Assessment*. 2011;18(3):263-283. doi:10.1177/1073191111411667

ii. Lai JS, Cella D, Choi S, Junghaenel DU, Christodoulou C, Gershon R, et al. How item banks and their application can influence measurement practice in rehabilitation medicine: a PROMIS fatigue item bank example. *Arch Phys Med Rehabil*. 2011 Oct;92(10 Suppl):S20-7. doi:10.1016/j.apmr.2010.08.033.

iii. Rose M, Bjorner JB, Gandek B, Bruce B, Fries JF, Ware JE Jr. The PROMIS Physical Function item bank was calibrated to a standardized metric and shown to improve measurement efficiency. *J Clin Epidemiol*. 2014 May;67(5):516-26. doi: 10.1016/j.jclinepi.2013.10.024.

iv. Buysse DJ, Yu L, Moul DE, Germain A, Stover A, Dodds NE, et al. Development and validation of patient-reported outcome measures for sleep disturbance and sleep-related impairments. *Sleep*. 2010 Jun;33(6):781-92. doi: 10.1093/sleep/33.6.781.

v. Hahn EA, DeWalt DA, Bode RK, Garcia SF, DeVellis RF, Correia H, et al. New English and Spanish social health measures will facilitate evaluating health determinants. *Health Psychol*. 2014 May;33(5):490-9. doi: 10.1037/hea0000055.

#### Appendix 4 – Adapted 12-item Berger HIV Stigma Scale

We used 2 subscales from the 12-item Berger HIV Stigma Scale: disclosure concerns and negative self-image. We then added 2 additional questions based on input from community partners to form a third subscale.

| Answers for all questions: | Scores |
|----------------------------|--------|
| Strongly agree             | 4      |
| Agree                      | 3      |
| Disagree                   | 2      |
| Strongly disagree          | 1      |

##### Subscale 1: Disclosure concerns:

1. Telling someone I have HIV is risky
2. I work hard to keep my HIV a secret
3. I am very careful who I tell that I have HIV

##### Subscale 2: Negative self-image

4. I feel guilty because I have HIV
5. People's attitudes about HIV make me feel worse about myself
6. I feel I'm not as good a person as others because I have HIV

##### Subscale 3: Added questions

7. HIV is a punishment.
8. HIV can happen to anyone.



### Appendix 5 – Adapted AUDIT

We adapted the AUDIT to allow for non-drinkers and those who drink less than 7 units per week to skip the entire questionnaire.

The first question offered to the patient is:

Do you drink alcohol?

If the answer is never, the questionnaire stops.

If the answer is one of the possible responses (monthly or less, two to four times a month, two to three times a week, four or more times a week), the patient is offered the second question:

How many units of alcohol do you drink per week?"

The responses "1 or 2", "3 or 4", and "5 or 6" stop the questionnaire. If the patient responds "7 to 9" or "10 or more", the patient is offered the rest of the questions in the AUDIT, as described in:

Saunders JB, Aasland OG, Babor TF, de la Fuente JR, Grant M. Development of the Alcohol Use Disorders Identification Test (AUDIT): WHO Collaborative Project on Early Detection of Persons with Harmful Alcohol Consumption--II. *Addiction*. 1993;88(6):791-804. doi:10.1111/j.1360-0443.1993.tb02093.x

### Appendix 6– Drug use (Adapted from DUDIT)

Patients are offered the first question of the DUDIT “How often do you use drugs other than alcohol?”. If the answer is “never”, the questionnaire stops. All other answers trigger the rest of the questionnaire, which can be found at <https://www.emcdda.europa.eu/system/files/attachments/12173/DUDIT-English-version.pdf>.

A list of drugs is offered to the patient with the question “What drugs have you ever tried?”. This list is based on feedback from community partners:

Cannabis  
Poppers  
Laughing gas  
XTC MDMA  
GHB  
GBL  
Ketamine  
Snort cocaine  
Speed  
Crystal meth (Tina, T, glass, ice)  
4-MEC  
4-FA (4-FMP)  
3-MEC  
3-MMC  
2C-B  
MXE  
LSD  
mushrooms  
Crack/ base coke  
Heroine  
other: .....

For peer review only

### Appendix 7– Social status screening questions

We developed a question to screen for problems related to housing, financial status, and migration status:

Do you experience any problems regarding housing, income and/or legal status? Yes/No

A positive answer triggers the HCP to fill in a form that can be used by nurses and the medical social worker to address patients' needs.

For peer review only

## Appendix 8 – Sexuality

The following questions were developed by nurses to ask about sexuality and relationships:

### Sexual health

1. Are you content about your sexual health in the past year? Yes/No/ NA
2. Do you experience any problems related to your sexuality or your sexual health at the moment? Yes/No/NA
3. Do you want to talk about your sexuality or sexual health at your next appointment? Yes/No/NA

### Relationships

1. Does living with HIV influence you in getting into intimate relationships? Yes/ No/NA

STROBE Statement—Checklist of items that should be included in reports of *cohort studies*

|                           | Item No | Recommendation                                                                                                                                                                                                                                                                                                         | Page No     |
|---------------------------|---------|------------------------------------------------------------------------------------------------------------------------------------------------------------------------------------------------------------------------------------------------------------------------------------------------------------------------|-------------|
| <b>Title and abstract</b> | 1       | (a) Indicate the study's design with a commonly used term in the title or the abstract<br>(b) Provide in the abstract an informative and balanced summary of what was done and what was found                                                                                                                          | 1<br>3      |
| <b>Introduction</b>       |         |                                                                                                                                                                                                                                                                                                                        |             |
| Background/rationale      | 2       | Explain the scientific background and rationale for the investigation being reported                                                                                                                                                                                                                                   | 3           |
| Objectives                | 3       | State specific objectives, including any prespecified hypotheses                                                                                                                                                                                                                                                       | 3           |
| <b>Methods</b>            |         |                                                                                                                                                                                                                                                                                                                        |             |
| Study design              | 4       | Present key elements of study design early in the paper                                                                                                                                                                                                                                                                | 3-5         |
| Setting                   | 5       | Describe the setting, locations, and relevant dates, including periods of recruitment, exposure, follow-up, and data collection                                                                                                                                                                                        | 3-5         |
| Participants              | 6       | (a) Give the eligibility criteria, and the sources and methods of selection of participants. Describe methods of follow-up<br>(b) For matched studies, give matching criteria and number of exposed and unexposed                                                                                                      | 3, Figure 2 |
| Variables                 | 7       | Clearly define all outcomes, exposures, predictors, potential confounders, and effect modifiers. Give diagnostic criteria, if applicable                                                                                                                                                                               | 5           |
| Data sources/measurement  | 8*      | For each variable of interest, give sources of data and details of methods of assessment (measurement). Describe comparability of assessment methods if there is more than one group                                                                                                                                   | 4-5         |
| Bias                      | 9       | Describe any efforts to address potential sources of bias                                                                                                                                                                                                                                                              | N/A         |
| Study size                | 10      | Explain how the study size was arrived at                                                                                                                                                                                                                                                                              | 4-5         |
| Quantitative variables    | 11      | Explain how quantitative variables were handled in the analyses. If applicable, describe which groupings were chosen and why                                                                                                                                                                                           | 5-6         |
| Statistical methods       | 12      | (a) Describe all statistical methods, including those used to control for confounding<br>(b) Describe any methods used to examine subgroups and interactions<br>(c) Explain how missing data were addressed<br>(d) If applicable, explain how loss to follow-up was addressed<br>(e) Describe any sensitivity analyses | 5-6         |
| <b>Results</b>            |         |                                                                                                                                                                                                                                                                                                                        |             |
| Participants              | 13*     | (a) Report numbers of individuals at each stage of study—eg numbers potentially eligible, examined for eligibility, confirmed eligible, included in the study, completing follow-up, and analysed<br>(b) Give reasons for non-participation at each stage<br>(c) Consider use of a flow diagram                        | N/A         |
| Descriptive data          | 14*     | (a) Give characteristics of study participants (eg demographic, clinical, social) and information on exposures and potential confounders<br>(b) Indicate number of participants with missing data for each variable of interest<br>(c) Summarise follow-up time (eg, average and total amount)                         | N/A         |
| Outcome data              | 15*     | Report numbers of outcome events or summary measures over time                                                                                                                                                                                                                                                         | N/A         |

|    |                          |    |                                                                                                                                                                                                              |     |
|----|--------------------------|----|--------------------------------------------------------------------------------------------------------------------------------------------------------------------------------------------------------------|-----|
| 1  | Main results             | 16 | (a) Give unadjusted estimates and, if applicable, confounder-adjusted estimates and their precision (eg, 95% confidence interval). Make clear which confounders were adjusted for and why they were included | N/A |
| 2  |                          |    | (b) Report category boundaries when continuous variables were categorized                                                                                                                                    |     |
| 3  |                          |    | (c) If relevant, consider translating estimates of relative risk into absolute risk for a meaningful time period                                                                                             |     |
| 4  | Other analyses           | 17 | Report other analyses done—eg analyses of subgroups and interactions, and sensitivity analyses                                                                                                               | N/A |
| 5  | <b>Discussion</b>        |    |                                                                                                                                                                                                              |     |
| 6  | Key results              | 18 | Summarise key results with reference to study objectives                                                                                                                                                     | N/A |
| 7  | Limitations              | 19 | Discuss limitations of the study, taking into account sources of potential bias or imprecision. Discuss both direction and magnitude of any potential bias                                                   | 7   |
| 8  | Interpretation           | 20 | Give a cautious overall interpretation of results considering objectives, limitations, multiplicity of analyses, results from similar studies, and other relevant evidence                                   | N/A |
| 9  | Generalisability         | 21 | Discuss the generalisability (external validity) of the study results                                                                                                                                        | N/A |
| 10 | <b>Other information</b> |    |                                                                                                                                                                                                              |     |
| 11 | Funding                  | 22 | Give the source of funding and the role of the funders for the present study and, if applicable, for the original study on which the present article is based                                                | 7   |

\*Give information separately for exposed and unexposed groups.

**Note:** An Explanation and Elaboration article discusses each checklist item and gives methodological background and published examples of transparent reporting. The STROBE checklist is best used in conjunction with this article (freely available on the Web sites of PLoS Medicine at <http://www.plosmedicine.org/>, Annals of Internal Medicine at <http://www.annals.org/>, and Epidemiology at <http://www.epidem.com/>). Information on the STROBE Initiative is available at <http://www.strobe-statement.org>.
